# Supplementary material for: Translational control of polyamine metabolism by CNBP is required for Drosophila locomotor function
Source: eLife. 2021 Sep 14;10:e69269. doi: 10.7554/eLife.69269 (PMC8439652; doi:10.7554/eLife.69269)
Supplement: Figure 1—source data 1. [file elife-69269-fig1-data1.xlsx]

## Sheet: Fig1B
3 DAYS 29°C
MhcGAL4>	Or-R	2XCNBP
	1	1
	1	1
	2	1
	3	1
	3	2
	4	2
	5	2
	9	3
	10	3
	11	4
	12	4
	12	5
	14	6
	16	7
	20	8
	22	8
	24	8
	24	8
	26	8
	26	9
	27	10			2Xcnbp			Or-R
	27	10		Class I 0-20	37		Class I: 0-20	15
	28	10		Class II 21-50	62		Class II: 21-50	38
	28	10		Class III 51-100	19		Class III: 51-100	57
	32	12		Class IV 101-150	0		Class IV: 101-150	6
	33	12
	33	13	st
	34	13
	34	14
	35	15
	38	15
	38	16
	40	17
	40	18
	40	19
	41	19
	42	19
	42	21
	43	21
	43	22
	43	22
	44	22
	46	22
	46	22
	46	22
	47	23
	47	24
	48	24
	49	24
	49	25
	49	26
	49	27
	50	27
	51	27
	52	28
	52	29
	52	29
	52	31
	53	31
	53	31
	54	33
	54	34
	55	34
	56	35
	56	35
	56	35
	56	35
	57	36
	58	36
	58	37
	58	37
	60	37
	61	37
	62	38
	62	38
	62	38
	63	38
	63	39
	63	40
	65	40
	66	41
	66	41
	66	42
	66	43
	68	43
	70	45
	70	45
	70	46
	75	46
	75	47
	76	48
	77	48
	78	48
	79	49
	80	50
	80	50
	81	50
	81	50
	81	50
	82	51
	83	51
	85	52
	87	52
	90	56
	91	56
	92	58
	94	59
	95	61
	97	61
	97	62
	103	64
	110	65
	111	67
	114	68
	119	74
	139	77
		78
		87
AVERAGE	53.569	31.5763
SEM	2.62111	1.84364

## Sheet: Fig1C
c179GAL4>	Or-R	2XdCNBP-RNAi		24BGAL4>	Or-R	2XdCNBP-RNAi
	53	30			30	14
	46	14			32	14
	52	9			30	15
	55	18			31	16
	50	14			32	22
	58	37			33	24
	53	36			34	24
	51	37			35	26
	59	38			39	28
	52	19			39	28
	54	36			44	30
	51	45			45	30
	51	38			47	30
	55	45			47	31
	56	47			49	31
	49	25			50	32
	49	29			50	32
	47	37			50	32
	62	37			50	33
	60	33			50	33
	47	24			51	34
	58	22			52	35
	58	32			52	36
	60	34			52	36
	64	28			53	36
	50	32			53	37
	37	30			53	38
	55	37			53	39
	40	39			55	39
	53	37			55	39
	60	29			55	39
	68	26			56	39
	70	35			56	40
	60	35			57	41
	57	37			58	41
	57	34			59	42
	52	44			59	42
	56	30			59	43
	57	32			60	43
	55	41			60	45
	55	19			60	47
	51	26			62	48
	60	29			63	48
	54	28			66	50
	50	33			67	53
	64	27			68	54
	62	32			69	55
	70	40			69	56
	67	32			71	57
	65	40			73	37
	50	30				34
	51	26				21
	50	30				23
	57	30				10
	57	33				35
	51	26				34
	52	27				21
	55	23				23
	55	21				10
	57	32				35
						22
						21
						18
						22
						11
						25
						24
						26
						27
						44
						27
						32
						25
						30
						34
						28
						24
						23
						23
						33
						23
						20
						31
						32

## Sheet: Fig1D
	Or-r (II instar)	CNBPk-mut (II instar)
	63	33
	69	24
	67	31
	75	22
	65	21
	67	19
	65	17
	60	18
	62	23
	66	23
	62	28
	65	20
	57	34
	59	22
	61	20
	62	24
	63	26
	57	26
	56	40
	53	28
	54	37
	67	32
	62	38
	64	30
	60	31
	62	27
	59	27
	62	40
	65	37
	58	25
	71	38
	65	39
	70	31
	70	28
	74	33
	75	28
	71	26
	75	33
	75	28
	70	39
	60	31
	61	34
	60	33
	62	37
	59	38
	71	34
	67	38
	66	39
	69	35
	67	33
	64.5	29.96
