# Supplementary material for: Translational control of polyamine metabolism by CNBP is required for Drosophila locomotor function
Source: eLife. 2021 Sep 14;10:e69269. doi: 10.7554/eLife.69269 (PMC8439652; doi:10.7554/eLife.69269)
Supplement: Figure 2—source data 1. [file elife-69269-fig2-data1.xlsx]

## Sheet: Fig2
C179GAL4>	Or-R	2xCNBP	2xCNBP+dCNBPres	2xCNBP+hCNBP	UASdCNBPres	UAShCNBP-Flag
	79	31	69	53	84	70
	79	34	57	49	75	70
	69	38	40	50	79	70
	75	35	50	54	82	68
	77	40	45	48	77	67
	80	30	54	47	56	63
	65	24	52	48	64	66																					Or-R	C179>CNBP2x	c179>CNBP2x+hCNBP
	71	29	48	51	59	67																					70	27	53
	79	23	54	50	57	66																					65	30	49
	66	22	52	46	50	65																					72	32	50
	70	25	63	50	65	70																					63	30	54
	70	24	62	55	74	73																					70	30	48
	67	27	41	48	69	75																					72	30	47
	68	26	53	50	54	72																					75	25	48
	69	31	55	52	65	70																					77	22	51
	69	28	71	55	56	64																					74	30	50
	77	29	65	53	66	65																					73	25	46
	77	31	44	50	52	65																					70	25	50
	77	30	56	52	55	67																					68	25	55
	77	30	57	50	56	68																					65	27	48
	75	27	59	56	53	71																					65	26	50
	78	26	57	63	72	72																					65	27	52
	77	30	63	50	70	70																					73	28	55
	68	27	62	55	68	63																					70	29	53
	70	30	67	50	69	65																					70	30	50
	70	27	56	53	70	66																					69	31	52
	65	30	61	49	75	65																					67	30	50
	72	32	57	52	77	62																					66	30	56
	63	30	58	50	77	65																					63	26	63
	70	30	52	55	75	70																					62	27	50
	72	30	59	51	72	72																					60	30	55
	75	25	50	47	65	70																					63	27	50
	77	22	50	50	66	68																					68.28	27.96	51.4
	74	30	49	49	65	72																					0.897255	0.494907	0.72111
	73	25	51	56	65	70
	70	25	56	52	69	73
	68	25	50	52	73	72
	65	27	51	51	75	73
	65	26	52	51	72	75
	65	27	53	51	72	72
	73	28	56	54	77	64
	70	29	61	47	72	65
	70	30	59	53	72	65
	69	31	49	50	70	69
	67	30	51	48	69	67
	66	30	53	50	65	75
	63	26	52	55		72
	62	27	58	52		70
	60	30	46	53		70
	63	27	59	50		73
	70	28	57	56
	68	28	62	54
	72	31	62	51
	75	27	53	51
	73	29	55	52
	73	29
	78	24
	75	27
	70	26
	65	26
	67	25
	68	30
	69	31
	70	30
	73	30
	73	28
	74	29
	77	31
	71	27
	65	26
	63	30
	68	28
	68	22
	68	21
	70	38
	73	34
	74	40
	71	25
	70	27
	71	24
	66	20
	72	22
	60	25
	59	29
	61	30
	60	38
	69	22
	58	25
	50	25
	65	21
	71	26
	52	23
	60	27
	63	25
	52	27
	74	29
	79	30
	70	25
	74	22
	62	23
	73	24
	78	25
	77	27
	68	23
	70	29
	79	30
	65	28
	72	27
	71	25
	70	27
	69.6182	27.7818	55.1636	51.4545	67.8261	68.74
	0.572803	0.3663	0.870684	0.400184	1.23292	0.491404
