# Supplementary material for: Translational control of polyamine metabolism by CNBP is required for Drosophila locomotor function
Source: eLife. 2021 Sep 14;10:e69269. doi: 10.7554/eLife.69269 (PMC8439652; doi:10.7554/eLife.69269)
Supplement: Figure 3—source data 1. [file elife-69269-fig3-data1.xlsx]

## Sheet: Fig3B
		polyamine levels (ng/mg)
Exp_1		PUT						average
C179GAL4>	OR	5.17					OR	7.65
	2xCNBPRNAi	2.96					C179GAL4>2xCNBPi	4.55333
Exp_2		PUT						%
C179GAL4>	OR	8.46					OR	100
	2xCNBPRNAi	4.56					C179GAL4>2xCNBPi	59.5207
Exp_3		PUT
C179GAL4>	OR	9.32
	2xCNBPRNAi	6.14

## Sheet: Fig3-S1
		polyamine levels (ng/mg)
Exp_1			%
	Or-R	7.93	100
	cnbpK	2.95	37.2005
Exp_2
	Or-R	9.26759	100				average%
	cnbpK	4.94394	53.3466			OR	100
						cnbpK	49.7243
Exp_3
	Or-R	10.959	100
	cnbpK	6.42479	58.6257
																			average
																			100
																			0
