# Supplementary material for: Translational control of polyamine metabolism by CNBP is required for Drosophila locomotor function
Source: eLife. 2021 Sep 14;10:e69269. doi: 10.7554/eLife.69269 (PMC8439652; doi:10.7554/eLife.69269)
Supplement: Figure 4—source data 1. [file elife-69269-fig4-data1.xlsx]

## Sheet: Fig4A
c179GAL4>	Or-R	ODC1 RNAi	ODC2 RNAi	ODC2;ODC1 RNAi	CNBP2x RNAi
	55	44	48	35	33
	52	44	45	35	32
	51	47	48	31	40
	52	41	49	35	29
	52	46	45	34	40
	50	46	45	37	38
	50	42	41	41	34
	51	40	42	34	38
	52	44	43	37	42
	53	43	41	38	25
	55	47	45	41	39
	54	36	42	39	35
	57	43	46	37	33
	53	40	47	37	28
	65	38	50	38	40
	53	41	48	40	35
	50	47	50	36	37
	55	42	50	41	36
	50	39	47	38	34
	50	46	47	40	25
	53	45	51	33	27
	54	39	47	45	41
	62	40	46	39	30
	64	40	49	42	38
	60	46	52	41	35
	60	44	44	36	33
	58	43	45	37	34
	56	42	46	38	35
	61	47	45	37	34
	63	46	46	38	35
	55.0333	42.9333	46.3333	37.6667	34.5	average
	0.863152	0.556948	0.525955	0.541036	0.830109	SEM

## Sheet: Fig4B
Or-R	dODC-mut
58	28			II instar larvae
55	32
58	32
60	36
53	37
56	28
64	31
60	30
60	26
54	32
69	35
67	31
68	30
63	33
64	24
60	31
62	26
56	30
58	30
60	28
60.25	30.5	average
1.01534	0.74162	SEM

## Sheet: Fig4C
OrR	OrR+DFMO 5mM
63	28
59	29
62	27
58	30
60	28
60	35
59	41
57	41
62	40
61	33
55	38
63	32
58	38
62	30
56	36
60	35
58	35
55	39
60	32
61	36
68	38
61	40
57	41
62	41
60	39
58	30
60	26
55	24
58	26
60	33
67	38
60	35
59	33
60	32
56	40
58	40
57	36
60	39
55	38
61	39
59.525	34.775	average
0.45852	0.779947	SEM

## Sheet: Fig4-S1
EXP I		ng poly/mg larvae
		PUT	%
C179GAL4>	Or-R	3.43382	100
	ODC1i	1.201	34.9756
	ODC2i	1.91213	55.6851
	ODC1i + ODC2i	1.7279	50.32
EXP II		ng poly/mg larvae
		PUT	%
C179GAL4>	Or-R	3.2	100
	ODC1i	1.6192	50.6
	ODC2i	1.7824	55.7
	ODC1i + ODC2i	2.5472	79.6
EXP III		ng poly/mg larvae
		PUT	%
C179GAL4>	Or-R	9.32	100
	ODC1i	7.94064	85.2
	ODC2i	8.03757	86.24
	ODC1i + ODC2i	4.7066	50.5
EXP IV		ng poly/mg larvae				Average(ng/mg)
		PUT	%
C179GAL4>	Or-R	10.71	100			100
	ODC1i	5.42	50.6069			55.3456
	ODC2i	5.97	55.7423			63.3419
	ODC1i + ODC2i	5.39	50.3268			57.6867
