# Supplementary material for: Translational control of polyamine metabolism by CNBP is required for Drosophila locomotor function
Source: eLife. 2021 Sep 14;10:e69269. doi: 10.7554/eLife.69269 (PMC8439652; doi:10.7554/eLife.69269)
Supplement: Figure 5—source data 1. [file elife-69269-fig5-data1.xlsx]

## Sheet: Fig5B
	ng poly/mg larvae
	PUT					ttest
CTRL1	5.51394			4.23293	average	0.00454746	**
CTRL2	3.89783			0.472786	SEM
CTRL3	4.2507
CTRL4	3.26923
DM2-1	0.498433			1.42081	average
DM2-2	1.36735			0.429133	SEM
DM2-3	2.57209
DM2-4	1.24538
