# Supplementary material for: Translational control of polyamine metabolism by CNBP is required for Drosophila locomotor function
Source: eLife. 2021 Sep 14;10:e69269. doi: 10.7554/eLife.69269 (PMC8439652; doi:10.7554/eLife.69269)
Supplement: Figure 6—source data 1. [file elife-69269-fig6-data1.xlsx]

## Sheet: Fig6A
Experiment 1
qPCR data analysis of ODC mRNA levels normalized on RPL11
NOTE: each biological sample ( OR or CNBP RNAi) has 2 replicates
	genotype	houskeeper	Ct	Ct mean		target gene	Ct	Ct mean	DCt	DDCt	fold change
C179 GAL4>	WT no UAS muscle	RPL11	14.65	14.7091		odc	24.825	24.7734	10.0644	0	1
		RPL11	14.7681			odc	24.7219
	WT no UAS muscle	RPL11	14.6329	14.8395		odc	24.7302	24.8792	10.0397	-0.0247105	1.01728
		RPL11	15.0461			odc	25.0282
C179 GAL4>	CNBP RNAi muscle	RPL11	15.7497	15.8744		odc	25.9446	25.8966	10.0222	-0.0422051	1.02969
		RPL11	15.9991			odc	25.8485
	CNBP RNAi muscle	RPL11	15.8741	15.8931		odc	25.8619	25.8724	9.97925	-0.0851234	1.06078
		RPL11	15.9122			odc	25.8828
Experiment 2
qPCR data analysis of ODC mRNA levels normalized on RPL11
NOTE: each biological sample ( OR or CNBP RNAi) has 2 replicates
	genotype	houskeeper	Ct	Ct mean		target gene	Ct	Ct mean	DCt	DDCt	fold change
C179 GAL4>	WT no UAS muscle	RPL11	13.1372	13.4957		odc	23.2734	23.5328	10.0372	0	1
		RPL11	13.8542			odc	23.7923
	WT no UAS muscle	RPL11	13.1308	13.1353		odc	23.1269	23.3307	10.1954	0.158274	0.896096
		RPL11	13.1397			odc	23.5345
C179 GAL4>	CNBP RNAi muscle	RPL11	13.0847	13.2045		odc	23.2571	23.3205	10.1161	0.0788955	0.946782
		RPL11	13.3243			odc	23.384
	CNBP RNAi muscle	RPL11	13.3635	13.3614		odc	23.2842	23.3715	10.0101	-0.027069	1.01894
		RPL11	13.3593			odc	23.4587

## Sheet: Fig6B-left
S2 cells (left)
Experiment 1
	odc	RPL11	CT MEAN	DCT_NoAB=CT_INPUT-CT NO AB	DCTX=CT INPUT-CTX	DDCT	fold change
no ab	38.009	Undetermined	38.009	11.2092		0	1
	38.009	Undetermined
CNBP Goat	36.59	Undetermined	36.5896		9.78984	-1.4194	2.67474
	36.59	Undetermined							2.67474
INPUT	26.881	Undetermined	26.7998						1.73795
	26.718	Undetermined							3.32023
								no ab	anti-CNBP Goat
								1	2.57764	average
									0.459337	SEM
Experiment 2
	odc	RPL11	CT MEAN	DCT_NoAB=CT_INPUT-CT NO AB	DCTX=CT INPUT-CTX	DDCT	fold change
no ab	34.297	Undetermined	34.297	-0.851967		0	1
	Undetermined	Undetermined
CNBP Goat	34.9251	Undetermined	35.0944		-1.64935	-0.797384	1.73795
	35.2638	Undetermined
INPUT	32.7931	Undetermined	33.4451
	34.097	Undetermined
Experiment 3
	odc	RPL11	CT MEAN	DCTNOAB=CTINPUT-CT NO AB	DCTX=CT INPUT-CTX	DDCT	2^
no ab	29.9535	Undetermined	30.0795	2.25514		0	1
	30.2055	Undetermined			0.523863	-1.73128	3.32023
Anti CNBP	28.4378	Undetermined	28.3482
	28.2586	Undetermined
input	27.7702	Undetermined	27.8244
	27.8786	Undetermined

## Sheet: Fig6B-right
Larval expracts
Experiment1
ODC
c179GAL4>		Ct	average
Or-R	No ab	31.4791	31.7252	2.14325		0	1
		31.9714
	IP Mouse	30.1498	30.0147		0.432668	-1.71058	3.27292
		29.8796
	OR INPUT	29.693	29.582
		29.471
2xCNBP-RNAi	No ab	31.5846	31.2098	4.65326		0	1
		30.835
	IP Mouse	31.1136	31.5484		4.99194	0.338679	0.790765
		31.9833
	INPUT	26.662	26.5565
		26.451
GAPDH
c179GAL4>		Ct	dct
Or-R	No ab	37.7372	-37.7372										no UAS	2xCNBPi
	IP Mouse	34.1648	-30.8446									No Ab	1	1
	INPUT	Undetermined	#VALUE!									IP	3.85866	1.13691
													3.27292	0.790765
2xCNBP-RNAi	No ab	33.7174	-33.7174										no UAS	2xCNBPi
	IP Mouse	34.8401	-4.82543									Average	2.71053	0.975893
	INPUT	30.7223	0.487469									SEM	0.292868	0.173075
Experiment1
ODC
c179>		Ct	average
Or-R	No Ab	32.2313	31.8701	6.97539	0	1
		31.509
	IP	32.1322	32.6483	7.75353	0.778143	0.583117
		33.1644
2xCNBP-RNAi	No Ab	31.8416	31.6744	5.5104	0	1
		31.5072
	IP	31.4577	31.9188	5.75479	0.244389	0.844173
		32.3799
	Input OR	24.8481	24.8948
		24.9414
	Input CNBPi	26.2569	26.164
		26.071
	GAPDH	Ct		dct
	No Ab OR	31.2984		0.571739	0.998728	0	1
	IP-OR	34.0247		-1.37636	-0.949371	-1.9481	3.85866
	No Ab-CNBPi	30.1078		1.56655	1.22822	0	1
	IP-CNBPi	30.5373		1.38143	1.04309	-0.185123	1.13691
	Input OR	25.3217		-0.426989
	Input CNBPi	25.8256		0.338332

## Sheet: Fig6C_exp1
CTRL							dCNBP RNAi
Time [min,]:	UV [A,U,]:	Conductivity [mS/cm]:	Events:				Time [min,]:	UV [A,U,]:	Conductivity [mS/cm]:	Events:
0	0.0275	0.04	Fraction 0,94 min				0	0.0309	0	Fraction 0,95 min	0.0288074
0.017	0.0279	0.04	Fraction 1,44 min				0.017	0.0309	0.02	Fraction 1,45 min	0.0288074
0.033	0.0311	0.06	Fraction 1,94 min				0.033	0.0403	0.02	Fraction 1,95 min	0.0375709
0.05	0.0323	0.04	Fraction 2,44 min				0.05	0.0844	0	Fraction 2,45 min	0.0786844
0.067	0.0305	0.04	Fraction 2,94 min				0.067	0.1165	0.02	Fraction 2,95 min	0.108611
0.083	0.0288	0.04	Fraction 3,44 min				0.083	0.089	0.02	Fraction 3,45 min	0.0829729
0.1	0.0634	0.04	Fraction 3,94 min				0.1	0.1007	0.02	Fraction 3,95 min	0.0938806
0.117	0.0856	0.04	Fraction 4,44 min				0.117	0.1071	0.02	Fraction 4,45 min	0.0998472
0.133	0.1011	0.04	Fraction 4,94 min				0.133	0.0714	0.02	Fraction 4,95 min	0.0665648
0.15	0.0947	0.06	Fraction 5,44 min				0.15	0.0714	0.04	Fraction 5,45 min	0.0665648
0.167	0.0659	0.04	Fraction 5,94 min				0.167	0.0713	0.02	Fraction 5,95 min	0.0664716
0.183	0.0614	0.04	Fraction 6,44 min				0.183	0.0711	0.02	Fraction 6,45 min	0.0662851
0.2	0.0613	0.04	Fraction 6,94 min				0.2	0.071	0.02	Fraction 6,95 min	0.0661919
0.217	0.0613	0.04	Fraction 6,95 min				0.217	0.0709	0.02	Fraction 6,96 min	0.0660986
0.233	0.0613	0.04					0.233	0.0708	0.04		0.0660054
0.25	0.0615	0.06					0.25	0.0708	0.02		0.0660054
0.267	0.0616	0.04					0.267	0.0706	0.04		0.065819
0.283	0.0615	0.04					0.283	0.0705	0.04		0.0657257
0.3	0.0612	0.04					0.3	0.0703	0.02		0.0655393
0.317	0.0609	0.04					0.317	0.0701	0		0.0653528
0.333	0.0605	0.04					0.333	0.07	0.02		0.0652596
0.35	0.0602	0.04					0.35	0.0699	0.04		0.0651664
0.367	0.0599	0.04					0.367	0.0698	0.02		0.0650731
0.383	0.0597	0.04					0.383	0.0696	0.02		0.0648867
0.4	0.0596	0.04					0.4	0.0694	0.02		0.0647002
0.417	0.0596	0.06					0.417	0.0692	0.02		0.0645138
0.433	0.0596	0.06					0.433	0.069	0.04		0.0643273
0.45	0.0597	0.06					0.45	0.0687	0.02		0.0640476
0.467	0.0599	0.04					0.467	0.0685	0.02		0.0638612
0.483	0.0601	0.06					0.483	0.0684	0.02		0.0637679
0.5	0.0603	0.04					0.5	0.0684	0.02		0.0637679
0.517	0.0604	0.04					0.517	0.0683	0.02		0.0636747
0.533	0.0607	0.04					0.533	0.0683	0.02		0.0636747
0.55	0.0606	0.04					0.55	0.0684	0.04		0.0637679
0.567	0.0608	0.02					0.567	0.0684	0.04		0.0637679
0.583	0.0609	0.04					0.583	0.0685	0.02		0.0638612
0.6	0.0609	0.04					0.6	0.0683	0.04		0.0636747
0.617	0.0611	0.04					0.617	0.0696	0.04		0.0648867
0.633	0.0613	0.04					0.633	0.0717	0.02		0.0668445
0.65	0.0613	0.04					0.65	0.0719	0.04		0.0670309
0.667	0.0614	0.04					0.667	0.0721	0.04		0.0672174
0.683	0.0613	0.06					0.683	0.0721	0.02		0.0672174
0.7	0.0614	0.04					0.7	0.0719	0.02		0.0670309
0.717	0.0614	0.04					0.717	0.0717	0.04		0.0668445
0.733	0.0614	0.04					0.733	0.0715	0.02		0.066658
0.75	0.0615	0.04					0.75	0.0711	0.02		0.0662851
0.767	0.0613	0.04					0.767	0.0705	0.02		0.0657257
0.783	0.0613	0.04					0.783	0.07	0.04		0.0652596
0.8	0.0612	0.04					0.8	0.0693	0.02		0.064607
0.817	0.0611	0.06					0.817	0.0688	0.04		0.0641409
0.833	0.061	0.04					0.833	0.0682	0.02		0.0635815
0.85	0.0609	0.04					0.85	0.0675	0.04		0.0629289
0.867	0.0608	0.04					0.867	0.067	0.02		0.0624628
0.883	0.0607	0.04					0.883	0.0665	0.04		0.0619966
0.9	0.0606	0.04					0.9	0.0663	0.02		0.0618102
0.917	0.0605	0.06					0.917	0.0662	0.02		0.0617169
0.933	0.0604	0.04					0.933	0.0662	0.02		0.0617169
0.95	0.0603	0.04					0.95	0.0663	0.04		0.0618102
0.967	0.0602	0.04					0.967	0.0665	0.04		0.0619966
0.983	0.0602	0.04					0.983	0.0669	0.02		0.0623695
1	0.06	0.04					1	0.0673	0.02		0.0627424
1.017	0.0599	0.04					1.017	0.0675	0.02		0.0629289
1.033	0.0599	0.04					1.033	0.0677	0.02		0.0631153
1.05	0.0597	0.04					1.05	0.0676	0.02		0.0630221
1.067	0.0597	0.04					1.067	0.0675	0.02		0.0629289
1.083	0.0595	0.04					1.083	0.0671	0.02		0.062556
1.1	0.0593	0.04					1.1	0.0665	0.02		0.0619966
1.117	0.0592	0.04					1.117	0.0661	0.02		0.0616237
1.133	0.0589	0.04					1.133	0.0652	0.04		0.0607847
1.15	0.0586	0.06					1.15	0.0643	0.02		0.0599456
1.167	0.0581	0.04					1.167	0.0635	0.02		0.0591998
1.183	0.0578	0.04					1.183	0.0628	0.04		0.0585472
1.2	0.0575	0.02					1.2	0.0621	0.06		0.0578946
1.217	0.0571	0.04					1.217	0.0613	0.04		0.0571488
1.233	0.0569	0.04					1.233	0.0607	0.04		0.0565894
1.25	0.0565	0.06					1.25	0.0602	0.04		0.0561233
1.267	0.0561	0.04					1.267	0.0597	0.02		0.0556571
1.283	0.0559	0.04					1.283	0.0596	0.04		0.0555639
1.3	0.0554	0.04					1.3	0.0593	0.04		0.0552842
1.317	0.0552	0.06					1.317	0.0593	0.04		0.0552842
1.333	0.0549	0.04					1.333	0.0593	0.04		0.0552842
1.35	0.0547	0.04					1.35	0.0594	0.02		0.0553774
1.367	0.0546	0.06					1.367	0.0597	0.04		0.0556571
1.383	0.0543	0.04					1.383	0.0597	0.04		0.0556571
1.4	0.0542	0.04					1.4	0.0599	0.04		0.0558436
1.417	0.0541	0.04					1.417	0.0601	0.02		0.05603
1.433	0.0538	0.04					1.433	0.06	0.04		0.0559368
1.45	0.0537	0.04					1.45	0.0601	0.02		0.05603
1.467	0.0533	0.04					1.467	0.0598	0.04		0.0557503
1.483	0.0532	0.04					1.483	0.0597	0.04		0.0556571
1.5	0.0529	0.04					1.5	0.0593	0.04		0.0552842
1.517	0.0526	0.04					1.517	0.0588	0		0.0548181
1.533	0.0524	0.04					1.533	0.0584	0.02		0.0544451
1.55	0.052	0.04					1.55	0.0576	0.02		0.0536993
1.567	0.0518	0.06					1.567	0.0571	0.02		0.0532332
1.583	0.0513	0.06					1.583	0.0564	0.02		0.0525806
1.6	0.0508	0.04					1.6	0.0556	0.02		0.0518348
1.617	0.0507	0.06					1.617	0.0552	0.02		0.0514619
1.633	0.0501	0.06					1.633	0.0544	0.02		0.050716
1.65	0.0499	0.04					1.65	0.0539	0.02		0.0502499
1.667	0.0495	0.06					1.667	0.0536	0.04		0.0499702
1.683	0.0492	0.06					1.683	0.0531	0.02		0.0495041
1.7	0.0492	0.04					1.7	0.0529	0.02		0.0493176
1.717	0.0489	0.04					1.717	0.0524	0.02		0.0488515
1.733	0.0488	0.04					1.733	0.0522	0.04		0.048665
1.75	0.0485	0.04					1.75	0.0521	0.04		0.0485718
1.767	0.0481	0.04					1.767	0.0518	0.02		0.0482921
1.783	0.0482	0.04					1.783	0.052	0.04		0.0484786
1.8	0.0478	0.04					1.8	0.0517	0.02		0.0481989
1.817	0.0478	0.04					1.817	0.0519	0.04		0.0483853
1.833	0.0477	0.04					1.833	0.0519	0.04		0.0483853
1.85	0.0476	0.04					1.85	0.0518	0.04		0.0482921
1.867	0.0478	0.04					1.867	0.0522	0.04		0.048665
1.883	0.0475	0.06					1.883	0.052	0.04		0.0484786
1.9	0.0476	0.04					1.9	0.0523	0.02		0.0487582
1.917	0.0476	0.04					1.917	0.0525	0.04		0.0489447
1.933	0.0474	0.04					1.933	0.0526	0.02		0.0490379
1.95	0.0476	0.04					1.95	0.0531	0.02		0.0495041
1.967	0.0473	0.04					1.967	0.0529	0.02		0.0493176
1.983	0.0474	0.04					1.983	0.0532	0.04		0.0495973
2	0.047	0.04					2	0.0533	0.04		0.0496905
2.017	0.0467	0.04					2.017	0.0531	0.04		0.0495041
2.033	0.0466	0.02					2.033	0.0533	0.04		0.0496905
2.05	0.0459	0.02					2.05	0.0528	0.04		0.0492244
2.067	0.0457	0.04					2.067	0.0526	0.04		0.0490379
2.083	0.0453	0.04					2.083	0.0523	0.02		0.0487582
2.1	0.0449	0.02					2.1	0.0516	0.02		0.0481056
2.117	0.0448	0.04					2.117	0.0516	0.02		0.0481056
2.133	0.0442	0.02					2.133	0.0506	0.02		0.0471734
2.15	0.0442	0.04					2.15	0.0502	0.02		0.0468005
2.167	0.0437	0.04					2.167	0.0498	0.02		0.0464275
2.183	0.0433	0.06					2.183	0.0493	0.02		0.0459614
2.2	0.0432	0.04					2.2	0.0492	0.04		0.0458682
2.217	0.0427	0.04					2.217	0.0485	0.04		0.0452156
2.233	0.0428	0.02					2.233	0.0484	0.04		0.0451223
2.25	0.0425	0.04					2.25	0.0481	0.02		0.0448427
2.267	0.0421	0.04					2.267	0.0476	0.02		0.0443765
2.283	0.0421	0.04					2.283	0.0477	0.02		0.0444698
2.3	0.0416	0.04					2.3	0.0469	0.02		0.0437239
2.317	0.0417	0.04					2.317	0.0469	0.02		0.0437239
2.333	0.0415	0.04					2.333	0.0465	0.02		0.043351
2.35	0.0416	0.04					2.35	0.0461	0.02		0.0429781
2.367	0.0417	0.04					2.367	0.0463	0.02		0.0431646
2.383	0.0415	0.02					2.383	0.0456	0.02		0.042512
2.4	0.0416	0.02					2.4	0.0456	0.04		0.042512
2.417	0.0415	0.04					2.417	0.0454	0.02		0.0423255
2.433	0.0416	0.04					2.433	0.0449	0.04		0.0418594
2.45	0.0398	0.04					2.45	0.0451	0.02		0.0420458
2.467	0.04	0.06					2.467	0.0444	0.02		0.0413932
2.483	0.0409	0.04					2.483	0.0445	0.02		0.0414865
2.5	0.0413	0.04					2.5	0.0443	0.02		0.0413
2.517	0.0416	0.06					2.517	0.0439	0.02		0.0409271
2.533	0.0417	0.06					2.533	0.0441	0.02		0.0411135
2.55	0.042	0.04					2.55	0.0436	0.04		0.0406474
2.567	0.0417	0.04					2.567	0.0437	0.02		0.0407406
2.583	0.0415	0.02					2.583	0.0436	0.04		0.0406474
2.6	0.0416	0.02					2.6	0.0433	0.02		0.0403677
2.617	0.0416	0.04					2.617	0.0437	0.02		0.0407406
2.633	0.0422	0.04					2.633	0.0434	0.02		0.0404609
2.65	0.0427	0.06					2.65	0.0436	0.04		0.0406474
2.667	0.0434	0.04					2.667	0.0438	0.02		0.0408339
2.683	0.0438	0.06					2.683	0.0439	0.04		0.0409271
2.7	0.044	0.04					2.7	0.0443	0.04		0.0413
2.717	0.0436	0.06					2.717	0.0445	0.02		0.0414865
2.733	0.0433	0.06					2.733	0.0452	0.04		0.0421391
2.75	0.0433	0.06					2.75	0.0457	0.02		0.0426052
2.767	0.0434	0.04					2.767	0.0461	0.02		0.0429781
2.783	0.0439	0.06					2.783	0.0464	0.02		0.0432578
2.8	0.0445	0.06					2.8	0.047	0.04		0.0438172
2.817	0.0452	0.04					2.817	0.0472	0.02		0.0440036
2.833	0.0453	0.04					2.833	0.0479	0.02		0.0446562
2.85	0.0448	0.04					2.85	0.0485	0.02		0.0452156
2.867	0.0447	0.04					2.867	0.0487	0.02		0.045402
2.883	0.0447	0.06					2.883	0.049	0.04		0.0456817
2.9	0.0447	0.06					2.9	0.0487	0.04		0.045402
2.917	0.0448	0.04					2.917	0.0487	0.02		0.045402
2.933	0.0447	0.04					2.933	0.0483	0		0.0450291
2.95	0.0446	0.06					2.95	0.048	0.02		0.0447494
2.967	0.0441	0.04					2.967	0.0476	0.04		0.0443765
2.983	0.0444	0.06					2.983	0.0471	0.02		0.0439104
3	0.0444	0.04					3	0.0468	0.04		0.0436307
3.017	0.0433	0.04					3.017	0.0465	0.02		0.043351
3.033	0.0431	0.06					3.033	0.0461	0		0.0429781
3.05	0.0426	0.04					3.05	0.0452	0.02		0.0421391
3.067	0.0423	0.06					3.067	0.0441	0.02		0.0411135
3.083	0.0418	0.06					3.083	0.044	0.02		0.0410203
3.1	0.0409	0.04					3.1	0.0434	0.02		0.0404609
3.117	0.0408	0.04					3.117	0.0433	0.02		0.0403677
3.133	0.0406	0.04					3.133	0.0425	0.04		0.0396219
3.15	0.04	0.04					3.15	0.0414	0.04		0.0385964
3.167	0.0401	0.04					3.167	0.0409	0.04		0.0381302
3.183	0.0395	0.04					3.183	0.0404	0.02		0.0376641
3.2	0.0395	0.06					3.2	0.0403	0.02		0.0375709
3.217	0.0394	0.04					3.217	0.0402	0.02		0.0374777
3.233	0.0389	0.04					3.233	0.0398	0.02		0.0371047
3.25	0.0391	0.04					3.25	0.0404	0.02		0.0376641
3.267	0.0386	0.04					3.267	0.0406	0.02		0.0378506
3.283	0.0388	0.06					3.283	0.0407	0.04		0.0379438
3.3	0.039	0.06					3.3	0.0411	0.04		0.0383167
3.317	0.0383	0.06					3.317	0.0404	0.02		0.0376641
3.333	0.0389	0.04					3.333	0.0409	0.02		0.0381302
3.35	0.0385	0.02					3.35	0.0408	0.04		0.038037
3.367	0.0387	0.04					3.367	0.0403	0.02		0.0375709
3.383	0.0388	0.06					3.383	0.0406	0.02		0.0378506
3.4	0.0384	0.06					3.4	0.0406	0.02		0.0378506
3.417	0.0388	0.04					3.417	0.0411	0.04		0.0383167
3.433	0.0384	0.04					3.433	0.0409	0.02		0.0381302
3.45	0.0386	0.04					3.45	0.041	0.02		0.0382235
3.467	0.0388	0.04					3.467	0.0417	0.02		0.0388761
3.483	0.0383	0.04					3.483	0.0411	0.02		0.0383167
3.5	0.0386	0.04					3.5	0.0416	0.02		0.0387828
3.517	0.0382	0.04					3.517	0.0417	0.02		0.0388761
3.533	0.0382	0.04					3.533	0.0412	0.02		0.0384099
3.55	0.0383	0.04					3.55	0.0416	0.02		0.0387828
3.567	0.0378	0.04					3.567	0.0413	0.02		0.0385032
3.583	0.0381	0.02					3.583	0.0417	0.02		0.0388761
3.6	0.0379	0.02					3.6	0.0415	0.02		0.0386896
3.617	0.0379	0.04					3.617	0.0414	0.02		0.0385964
3.633	0.0378	0.04					3.633	0.0414	0.04		0.0385964
3.65	0.0372	0.04					3.65	0.0407	0.04		0.0379438
3.667	0.0373	0.02					3.667	0.0408	0.02		0.038037
3.683	0.037	0.04					3.683	0.0404	0.04		0.0376641
3.7	0.0369	0.02					3.7	0.0404	0.04		0.0376641
3.717	0.0367	0.04					3.717	0.0404	0.04		0.0376641
3.733	0.0363	0.04					3.733	0.0401	0.02		0.0373844
3.75	0.0365	0.02					3.75	0.0403	0.02		0.0375709
3.767	0.0363	0.02					3.767	0.0396	0.02		0.0369183
3.783	0.0363	0.02					3.783	0.0402	0.02		0.0374777
3.8	0.0358	0.02					3.8	0.0398	0.04		0.0371047
3.817	0.0356	0.02					3.817	0.0393	0.02		0.0366386
3.833	0.0356	0.02					3.833	0.0393	0.02		0.0366386
3.85	0.0354	0.02					3.85	0.0388	0.04		0.0361725
3.867	0.0353	0.02					3.867	0.0394	0.04		0.0367318
3.883	0.0348	0.04					3.883	0.0386	0.04		0.035986
3.9	0.0348	0.04					3.9	0.0386	0.02		0.035986
3.917	0.0349	0.02					3.917	0.0387	0.02		0.0360792
3.933	0.0347	0.04					3.933	0.038	0.02		0.0354266
3.95	0.0347	0.02					3.95	0.0388	0.04		0.0361725
3.967	0.034	0.02					3.967	0.0379	0.04		0.0353334
3.983	0.0339	0.02					3.983	0.0377	0.02		0.035147
4	0.0339	0.02					4	0.0379	0.02		0.0353334
4.017	0.0337	0.02					4.017	0.0374	0.04		0.0348673
4.033	0.0337	0.04					4.033	0.0378	0.04		0.0352402
4.05	0.0332	0.04					4.05	0.0372	0		0.0346808
4.067	0.0331	0.02					4.067	0.0374	0		0.0348673
4.083	0.0333	0.02					4.083	0.0375	0.02		0.0349605
4.1	0.033	0.02					4.1	0.0367	0.02		0.0342147
4.117	0.0331	0.02					4.117	0.0373	0.02		0.034774
4.133	0.0324	0.02					4.133	0.0364	0.04		0.033935
4.15	0.0323	0.02					4.15	0.0364	0.02		0.033935
4.167	0.0322	0.02					4.167	0.0366	0.04		0.0341214
4.183	0.0321	0.02					4.183	0.0361	0.04		0.0336553
4.2	0.0321	0.02					4.2	0.0361	0.04		0.0336553
4.217	0.0318	0.02					4.217	0.0356	0.02		0.0331892
4.233	0.0316	0.04					4.233	0.0357	0.02		0.0332824
4.25	0.0316	0.02					4.25	0.0357	0.02		0.0332824
4.267	0.0315	0.04					4.267	0.0352	0.02		0.0328163
4.283	0.0317	0.02					4.283	0.0356	0.02		0.0331892
4.3	0.0313	0.02					4.3	0.035	0.02		0.0326298
4.317	0.0311	0.04					4.317	0.0347	0.04		0.0323501
4.333	0.031	0.04					4.333	0.0344	0.04		0.0320704
4.35	0.0308	0.02					4.35	0.0343	0.02		0.0319772
4.367	0.0308	0.02					4.367	0.0345	0.04		0.0321637
4.383	0.0307	0.02					4.383	0.0342	0.04		0.031884
4.4	0.0306	0.04					4.4	0.0343	0		0.0319772
4.417	0.0307	0.02					4.417	0.0342	0.02		0.031884
4.433	0.0306	0.02					4.433	0.0341	0.04		0.0317907
4.45	0.0304	0.02					4.45	0.0343	0.04		0.0319772
4.467	0.0302	0.02					4.467	0.0337	0.02		0.0314178
4.483	0.03	0.02					4.483	0.0334	0.02		0.0311381
4.5	0.0301	0.02					4.5	0.0331	0.04		0.0308585
4.517	0.03	0.02					4.517	0.033	0.04		0.0307652
4.533	0.0297	0.04					4.533	0.0331	0.04		0.0308585
4.55	0.0296	0.02					4.55	0.0328	0.04		0.0305788
4.567	0.0296	0.02					4.567	0.033	0.04		0.0307652
4.583	0.0296	0.02					4.583	0.0332	0.04		0.0309517
4.6	0.0294	0.02					4.6	0.0331	0.02		0.0308585
4.617	0.0294	0.02					4.617	0.0333	0.02		0.0310449
4.633	0.0295	0.02					4.633	0.0327	0.04		0.0304856
4.65	0.0294	0.02					4.65	0.0326	0.04		0.0303923
4.667	0.0292	0.04					4.667	0.0324	0.04		0.0302059
4.683	0.0291	0.02					4.683	0.0321	0.04		0.0299262
4.7	0.0289	0.02					4.7	0.0323	0.04		0.0301126
4.717	0.0292	0.02					4.717	0.0323	0.02		0.0301126
4.733	0.0293	0.02					4.733	0.0325	0.04		0.0302991
4.75	0.0294	0.02					4.75	0.0326	0.04		0.0303923
4.767	0.0294	0.02					4.767	0.0326	0.04		0.0303923
4.783	0.0293	0.02					4.783	0.0329	0.04		0.030672
4.8	0.0295	0.02					4.8	0.0326	0.02		0.0303923
4.817	0.0295	0.02					4.817	0.0326	0.02		0.0303923
4.833	0.0292	0					4.833	0.0325	0.04		0.0302991
4.85	0.0292	0.02					4.85	0.0325	0.04		0.0302991
4.867	0.029	0.02					4.867	0.0328	0.04		0.0305788
4.883	0.0294	0.02					4.883	0.0328	0.02		0.0305788
4.9	0.0295	0.02					4.9	0.0331	0.02		0.0308585
4.917	0.0294	0					4.917	0.0332	0.04		0.0309517
4.933	0.0295	0.02					4.933	0.0333	0.04		0.0310449
4.95	0.0294	0					4.95	0.0335	0.02		0.0312314
4.967	0.0298	0.02					4.967	0.0335	0.04		0.0312314
4.983	0.0298	0.02					4.983	0.0338	0.04		0.0315111
5	0.0295	0.02					5	0.0336	0.04		0.0313246
5.017	0.03	0.02					5.017	0.0341	0.02		0.0317907
5.033	0.0299	0.02					5.033	0.0343	0.02		0.0319772
5.05	0.0305	0.02					5.05	0.0345	0.02		0.0321637
5.067	0.0307	0.02					5.067	0.035	0.04		0.0326298
5.083	0.0303	0.02					5.083	0.0349	0.04		0.0325366
5.1	0.0307	0.02					5.1	0.0355	0.04		0.0330959
5.117	0.031	0.02					5.117	0.0359	0.04		0.0334688
5.133	0.0316	0.02					5.133	0.036	0.02		0.0335621
5.15	0.032	0					5.15	0.0367	0.02		0.0342147
5.167	0.0315	0.02					5.167	0.0365	0.04		0.0340282
5.183	0.0326	0.02					5.183	0.0376	0.04		0.0350537
5.2	0.0325	0.02					5.2	0.038	0.04		0.0354266
5.217	0.0331	0					5.217	0.0382	0.04		0.0356131
5.233	0.0337	0.02					5.233	0.0391	0.04		0.0364521
5.25	0.0335	0.02					5.25	0.039	0.04		0.0363589
5.267	0.0346	0.02					5.267	0.0402	0.04		0.0374777
5.283	0.0346	0.02					5.283	0.0407	0.06		0.0379438
5.3	0.0352	0.04					5.3	0.0407	0.04		0.0379438
5.317	0.0363	0.02					5.317	0.0421	0.04		0.039249
5.333	0.036	0.02					5.333	0.0417	0.04		0.0388761
5.35	0.0379	0.04					5.35	0.0434	0.04		0.0404609
5.367	0.0376	0.04					5.367	0.044	0.02		0.0410203
5.383	0.0382	0.04					5.383	0.0437	0.02		0.0407406
5.4	0.0394	0.02					5.4	0.0456	0.02		0.042512
5.417	0.0389	0.02					5.417	0.0451	0.04		0.0420458
5.433	0.0408	0.02					5.433	0.0469	0.04		0.0437239
5.45	0.0408	0.02					5.45	0.0477	0.04		0.0444698
5.467	0.0416	0.02					5.467	0.0475	0.04		0.0442833
5.483	0.0437	0.02					5.483	0.0504	0.02		0.0469869
5.5	0.0432	0.02					5.5	0.0491	0.02		0.0457749
5.517	0.0465	0					5.517	0.0518	0.04		0.0482921
5.533	0.0467	0.02					5.533	0.0523	0.04		0.0487582
5.55	0.0473	0.02					5.55	0.0517	0.04		0.0481989
5.567	0.0494	0.02					5.567	0.0546	0.02		0.0509025
5.583	0.0478	0.04					5.583	0.0543	0.02		0.0506228
5.6	0.0507	0.04					5.6	0.0587	0.02		0.0547248
5.617	0.05	0.02					5.617	0.0613	0.04		0.0571488
5.633	0.0506	0.02					5.633	0.0634	0.04		0.0591065
5.65	0.0541	0.02					5.65	0.0679	0.04		0.0633018
5.667	0.0569	0.02					5.667	0.0664	0.02		0.0619034
5.683	0.0646	0.02					5.683	0.0705	0.04		0.0657257
5.7	0.0677	0.02					5.7	0.0728	0.04		0.06787
5.717	0.0709	0.02					5.717	0.0741	0.04		0.0690819
5.733	0.0752	0.04					5.733	0.0791	0.04		0.0737433
5.75	0.0741	0.04					5.75	0.0785	0.04		0.073184
5.767	0.0782	0.04					5.767	0.0834	0.04		0.0777521
5.783	0.0802	0.04					5.783	0.0867	0.04		0.0808287
5.8	0.0817	0.04					5.8	0.0888	0.02		0.0827865
5.817	0.0885	0.02					5.817	0.0965	0.04		0.089965
5.833	0.0876	0.04					5.833	0.0958	0.04		0.0893124
5.85	0.0935	0.04					5.85	0.1027	0.04		0.0957451
5.867	0.0972	0.04					5.867	0.1076	0.04		0.100313
5.883	0.0994	0.04					5.883	0.1082	0.06		0.100873
5.9	0.1076	0.06					5.9	0.1165	0.04		0.108611
5.917	0.1065	0.04					5.917	0.1156	0.02		0.107772
5.933	0.1126	0.04					5.933	0.1221	0.04		0.113831
5.95	0.117	0.04					5.95	0.1276	0.04		0.118959
5.967	0.1183	0.04					5.967	0.1285	0.04		0.119798
5.983	0.1282	0.06					5.983	0.1382	0.04		0.128841
6	0.1265	0.04					6	0.1358	0.04		0.126604
6.017	0.134	0.04					6.017	0.1412	0.04		0.131638
6.033	0.1379	0.02					6.033	0.1461	0.04		0.136206
6.05	0.1373	0.02					6.05	0.1439	0.04		0.134155
6.067	0.1465	0.04					6.067	0.1523	0.02		0.141986
6.083	0.1431	0.06					6.083	0.1495	0.04		0.139376
6.1	0.1494	0.04					6.1	0.1543	0.02		0.143851
6.117	0.1526	0.04					6.117	0.1588	0.04		0.148046
6.133	0.152	0.04					6.133	0.1569	0.02		0.146275
6.15	0.1604	0.04					6.15	0.1643	0.04		0.153174
6.167	0.1563	0.04					6.167	0.1588	0.02		0.148046
6.183	0.1621	0.04					6.183	0.1612	0.02		0.150284
6.2	0.1639	0.04					6.2	0.163	0.04		0.151962
6.217	0.1608	0.04					6.217	0.1577	0.04		0.147021
6.233	0.1659	0.04					6.233	0.1634	0.04		0.152335
6.25	0.1603	0.04					6.25	0.1591	0.02		0.148326
6.267	0.1635	0.04					6.267	0.1615	0.04		0.150563
6.283	0.1663	0.04					6.283	0.1653	0.04		0.154106
6.3	0.1642	0.06					6.3	0.1645	0.02		0.15336
6.317	0.1709	0.04					6.317	0.1725	0.04		0.160818
6.333	0.1635	0.04					6.333	0.1659	0.04		0.154665
6.35	0.1677	0.04					6.35	0.1678	0.04		0.156437
6.367	0.1684	0.04					6.367	0.1694	0.04		0.157928
6.383	0.1647	0.04					6.383	0.164	0.04		0.152894
6.4	0.1691	0.04					6.4	0.1704	0.02		0.15886
6.417	0.1635	0.04					6.417	0.1667	0.02		0.155411
6.433	0.1668	0.04					6.433	0.1671	0.04		0.155784
6.45	0.1678	0.04					6.45	0.1685	0.04		0.157089
6.467	0.1655	0.04					6.467	0.1642	0.02		0.15308
6.483	0.1716	0.04					6.483	0.169	0.02		0.157555
6.5	0.1638	0.04					6.5	0.1601	0.02		0.149258
6.517	0.1669	0.04					6.517	0.1601	0.04		0.149258
6.533	0.1658	0.02					6.533	0.161	0.04		0.150097
6.55	0.1614	0.04					6.55	0.1553	0.02		0.144783
6.567	0.1647	0.06					6.567	0.1572	0.02		0.146554
6.583	0.1583	0.04					6.583	0.1516	0.02		0.141334
6.6	0.1583	0.04					6.6	0.1475	0.04		0.137511
6.617	0.1542	0.04					6.617	0.1431	0.04		0.133409
6.633	0.1485	0.04					6.633	0.1339	0.02		0.124832
6.65	0.1466	0.04					6.65	0.1295	0.04		0.12073
6.667	0.1365	0.04					6.667	0.1231	0.02		0.114764
6.683	0.1316	0.04					6.683	0.122	0.02		0.113738
6.7	0.1251	0.04					6.7	0.1197	0.02		0.111594
6.717	0.1212	0.02					6.717	0.1198	0.02		0.111687
6.733	0.1201	0.04					6.733	0.1249	0.02		0.116442
6.75	0.1153	0.06					6.75	0.1439	0.02		0.134155
6.767	0.122	0.04					6.767	0.152	0.02		0.141707
6.783	0.1222	0.04					6.783	0.2079	0.02		0.193821
6.8	0.1375	0.04					6.8	0.2113	0.04		0.196991
6.817	0.2181	0.04					6.817	0.1857	0.02		0.173124
6.833	0.3032	0.04					6.833	0.1355	0.04		0.126324
6.85	0.3371	0.04					6.85	0.0719	0.04		0.0670309
6.867	0.3126	0.04					6.867	0.0732	0.04		0.0682429
6.883	0.181	0.02					6.883	0.0723	0.04		0.0674038
6.9	0.0893	0.04					6.9	0.0765	0.04		0.0713194
6.917	0.0778	0.04					6.917	0.0764	0.04		0.0712262
6.933	0.0825	0.04					6.933	0.0761	0.02		0.0709465
6.95	0.086	0.04					6.95	0.0729	0.04		0.0679632
6.967	0.0906	0.04					6.967	0.0701	0.02		0.0653528
6.983	0.094	0.04
7	0.0957	0.06
7.017	0.0924	0.04

## Sheet: Fig6C_exp2
CTRL						dCNBP RNAi
Time [min,]:	UV [A,U,]:	Conductivity [mS/cm]:	Events:			Time [min,]:	UV [A,U,]:	Conductivity [mS/cm]:	Events:
0	0.0342	0.06	Fraction 0,95 min			0	0.0743	0.04	Fraction 0,96 min
0.017	0.0496	0.04	Fraction 1,45 min			0.017	0.0743	0.04	Fraction 1,46 min
0.033	0.0538	0.04	Fraction 1,95 min			0.033	0.0743	0.04	Fraction 1,96 min
0.05	0.0525	0.06	Fraction 2,45 min			0.05	0.0743	0.04	Fraction 2,46 min
0.067	0.0527	0.06	Fraction 2,95 min			0.067	0.0867	0.02	Fraction 2,96 min
0.083	0.0528	0.06	Fraction 3,45 min			0.083	0.0901	0.04	Fraction 3,46 min
0.1	0.0595	0.06	Fraction 3,95 min			0.1	0.1683	0.04	Fraction 3,96 min
0.117	0.08	0.04	Fraction 4,45 min			0.117	0.1593	0.04	Fraction 4,46 min
0.133	0.0891	0.04	Fraction 4,95 min			0.133	0.0925	0.04	Fraction 4,96 min
0.15	0.0724	0.04	Fraction 5,45 min			0.15	0.0717	0.04	Fraction 5,46 min
0.167	0.0797	0.04	Fraction 5,95 min			0.167	0.0706	0.02	Fraction 5,96 min
0.183	0.0745	0.04	Fraction 6,45 min			0.183	0.0701	0.04	Fraction 6,46 min
0.2	0.0689	0.06	Fraction 6,95 min			0.2	0.0699	0.04	Fraction 6,96 min
0.217	0.0682	0.04	Fraction 6,96 min			0.217	0.0703	0.04	Fraction 6,98 min
0.233	0.0681	0.06				0.233	0.0707	0.04
0.25	0.0686	0.04				0.25	0.0712	0.04
0.267	0.0693	0.04				0.267	0.0716	0.04
0.283	0.0699	0.02				0.283	0.072	0.04
0.3	0.0702	0.02				0.3	0.0723	0.04
0.317	0.0703	0.02				0.317	0.0726	0.04
0.333	0.0706	0.02				0.333	0.0726	0.04
0.35	0.0706	0.02				0.35	0.0726	0.02
0.367	0.0712	0.04				0.367	0.0724	0.04
0.383	0.0723	0.04				0.383	0.072	0.04
0.4	0.0724	0.04				0.4	0.0716	0.02
0.417	0.0719	0.06				0.417	0.0712	0.02
0.433	0.0724	0.04				0.433	0.0709	0.04
0.45	0.0726	0.04				0.45	0.0706	0.04
0.467	0.0719	0.02				0.467	0.0705	0.02
0.483	0.0716	0.02				0.483	0.0704	0.02
0.5	0.0714	0.04				0.5	0.0702	0.02
0.517	0.0713	0.02				0.517	0.07	0.04
0.533	0.0715	0.02				0.533	0.0697	0.04
0.55	0.072	0.02				0.55	0.0698	0.04
0.567	0.0712	0.04				0.567	0.0694	0.02
0.583	0.0714	0.02				0.583	0.0691	0.02
0.6	0.0716	0.04				0.6	0.069	0.02
0.617	0.0719	0.04				0.617	0.0688	0.02
0.633	0.0722	0.02				0.633	0.0689	0.02
0.65	0.0725	0.04				0.65	0.0688	0.02
0.667	0.0728	0.04				0.667	0.0688	0.02
0.683	0.0728	0.02				0.683	0.0689	0.04
0.7	0.0731	0.02				0.7	0.0689	0.04
0.717	0.0732	0.02				0.717	0.0691	0.02
0.733	0.0734	0.04				0.733	0.0692	0.02
0.75	0.0735	0.02				0.75	0.0694	0.02
0.767	0.0735	0.02				0.767	0.0695	0.02
0.783	0.0733	0.02				0.783	0.0694	0.02
0.8	0.0728	0.04				0.8	0.0693	0.02
0.817	0.0723	0.04				0.817	0.069	0.02
0.833	0.072	0.04				0.833	0.0686	0.04
0.85	0.0716	0.04				0.85	0.0682	0.02
0.867	0.0706	0.02				0.867	0.0674	0.02
0.883	0.0699	0.02				0.883	0.0669	0.02
0.9	0.0689	0.02				0.9	0.0663	0.02
0.917	0.068	0.02				0.917	0.0657	0.02
0.933	0.0671	0.02				0.933	0.0652	0.02
0.95	0.0661	0.04				0.95	0.0646	0.02
0.967	0.0655	0.02				0.967	0.0641	0
0.983	0.0647	0.02				0.983	0.0637	0.02
1	0.0643	0.02				1	0.0633	0.02
1.017	0.0638	0.02				1.017	0.0631	0.02
1.033	0.0633	0.02				1.033	0.0627	0
1.05	0.0631	0.02				1.05	0.0626	0.02
1.067	0.0626	0.02				1.067	0.0624	0.04
1.083	0.0625	0.04				1.083	0.0622	0.02
1.1	0.0624	0.02				1.1	0.0623	0.02
1.117	0.0622	0.02				1.117	0.0621	0.02
1.133	0.0624	0.02				1.133	0.0622	0.02
1.15	0.0624	0.02				1.15	0.0622	0.02
1.167	0.0626	0.02				1.167	0.0622	0.04
1.183	0.0624	0.02				1.183	0.0623	0.04
1.2	0.0623	0.02				1.2	0.0622	0.02
1.217	0.0624	0.02				1.217	0.0623	0.02
1.233	0.0621	0.02				1.233	0.0622	0.02
1.25	0.062	0.02				1.25	0.062	0.04
1.267	0.0616	0				1.267	0.062	0.02
1.283	0.0612	0				1.283	0.0615	0.02
1.3	0.0608	0.02				1.3	0.0612	0.02
1.317	0.06	0.02				1.317	0.0607	0.02
1.333	0.0596	0.02				1.333	0.0601	0.02
1.35	0.0589	0.04				1.35	0.0598	0.02
1.367	0.0585	0.02				1.367	0.059	0.02
1.383	0.0581	0.02				1.383	0.0585	0.02
1.4	0.057	0.02				1.4	0.058	0.02
1.417	0.0567	0.04				1.417	0.0574	0.02
1.433	0.0559	0.02				1.433	0.0573	0.02
1.45	0.0553	0.02				1.45	0.0566	0.02
1.467	0.055	0.02				1.467	0.0563	0
1.483	0.0543	0.02				1.483	0.0561	0
1.5	0.0543	0.02				1.5	0.0557	0.02
1.517	0.0538	0				1.517	0.0559	0.02
1.533	0.0535	0				1.533	0.0554	0.02
1.55	0.0534	0.02				1.55	0.0554	0.02
1.567	0.0527	0.04				1.567	0.0553	0.02
1.583	0.0527	0.02				1.583	0.0551	0.02
1.6	0.0522	0.02				1.6	0.0554	0.02
1.617	0.0519	0.02				1.617	0.055	0.02
1.633	0.052	0.02				1.633	0.0551	0.04
1.65	0.0516	0.02				1.65	0.0551	0.04
1.667	0.0517	0.02				1.667	0.055	0.02
1.683	0.0516	0.02				1.683	0.0553	0.02
1.7	0.0515	0.02				1.7	0.055	0
1.717	0.0518	0.02				1.717	0.0552	0.02
1.733	0.0514	0.04				1.733	0.0552	0.02
1.75	0.0516	0.02				1.75	0.0551	0.02
1.767	0.0516	0.02				1.767	0.0554	0.04
1.783	0.0515	0.02				1.783	0.0551	0.02
1.8	0.0517	0.02				1.8	0.0552	0.02
1.817	0.0513	0.04				1.817	0.056	0.02
1.833	0.0514	0.02				1.833	0.0556	0.02
1.85	0.0512	0.02				1.85	0.0553	0.02
1.867	0.0508	0.02				1.867	0.0542	0.04
1.883	0.0507	0.02				1.883	0.054	0.02
1.9	0.0498	0.02				1.9	0.0537	0.02
1.917	0.0494	0.04				1.917	0.053	0.02
1.933	0.0488	0.02				1.933	0.0529	0.02
1.95	0.0482	0.02				1.95	0.0519	0.02
1.967	0.048	0				1.967	0.0516	0.02
1.983	0.0473	0.02				1.983	0.0513	0.02
2	0.0472	0.04				2	0.0506	0.04
2.017	0.0468	0.04				2.017	0.0508	0.02
2.033	0.0462	0.02				2.033	0.0501	0.02
2.05	0.0463	0.02				2.05	0.05	0.02
2.067	0.0456	0.02				2.067	0.0499	0.02
2.083	0.0456	0.02				2.083	0.0493	0.02
2.1	0.0452	0.02				2.1	0.0495	0.02
2.117	0.0446	0.02				2.117	0.0488	0.02
2.133	0.0447	0.02				2.133	0.0487	0.02
2.15	0.044	0.02				2.15	0.0486	0.02
2.167	0.044	0.02				2.167	0.048	0.02
2.183	0.0438	0.02				2.183	0.0483	0.02
2.2	0.0434	0.02				2.2	0.0476	0.04
2.217	0.0437	0.02				2.217	0.0476	0.02
2.233	0.0429	0.02				2.233	0.0477	0.02
2.25	0.0431	0.02				2.25	0.0471	0.02
2.267	0.0429	0.04				2.267	0.0475	0.02
2.283	0.0426	0.04				2.283	0.047	0.02
2.3	0.0429	0.02				2.3	0.047	0.02
2.317	0.0423	0.02				2.317	0.0471	0.02
2.333	0.0426	0.02				2.333	0.0467	0.02
2.35	0.0426	0.04				2.35	0.0472	0.02
2.367	0.0425	0.04				2.367	0.0467	0.04
2.383	0.0431	0.04				2.383	0.0468	0.02
2.4	0.0429	0.04				2.4	0.047	0.02
2.417	0.0431	0.02				2.417	0.0466	0.02
2.433	0.0431	0.04				2.433	0.0471	0.02
2.45	0.043	0.04				2.45	0.0468	0.02
2.467	0.0434	0.02				2.467	0.0469	0.02
2.483	0.0429	0.02				2.483	0.0471	0.02
2.5	0.0432	0.02				2.5	0.047	0.02
2.517	0.0438	0.02				2.517	0.0475	0.02
2.533	0.0439	0.02				2.533	0.0473	0
2.55	0.0444	0.02				2.55	0.0476	0.02
2.567	0.0444	0.02				2.567	0.048	0.02
2.583	0.0451	0.02				2.583	0.0481	0.02
2.6	0.0457	0.02				2.6	0.0485	0.04
2.617	0.046	0.04				2.617	0.0487	0.04
2.633	0.0468	0.04				2.633	0.049	0.02
2.65	0.0472	0.02				2.65	0.0495	0.02
2.667	0.0477	0.02				2.667	0.0497	0.02
2.683	0.0481	0.02				2.683	0.0499	0.04
2.7	0.0481	0.02				2.7	0.0501	0.02
2.717	0.0485	0.02				2.717	0.0502	0.02
2.733	0.0484	0.02				2.733	0.0504	0.02
2.75	0.0484	0.02				2.75	0.0504	0.02
2.767	0.0484	0.02				2.767	0.0502	0.02
2.783	0.0478	0.04				2.783	0.05	0.02
2.8	0.0479	0.04				2.8	0.0496	0.02
2.817	0.0474	0.04				2.817	0.0492	0.02
2.833	0.0472	0.02				2.833	0.0486	0
2.85	0.0475	0.02				2.85	0.0481	0.02
2.867	0.047	0.02				2.867	0.0475	0.02
2.883	0.0471	0.02				2.883	0.0465	0.02
2.9	0.0463	0.04				2.9	0.0459	0.04
2.917	0.0461	0.02				2.917	0.045	0.04
2.933	0.046	0.02				2.933	0.0444	0.02
2.95	0.0453	0.04				2.95	0.0436	0.02
2.967	0.0451	0.04				2.967	0.043	0.04
2.983	0.0444	0.04				2.983	0.0428	0.02
3	0.0441	0.04				3	0.0424	0.04
3.017	0.0441	0.04				3.017	0.0426	0.02
3.033	0.0435	0.04				3.033	0.0423	0.02
3.05	0.0435	0.04				3.05	0.0415	0.02
3.067	0.0428	0.04				3.067	0.0415	0.04
3.083	0.0424	0.02				3.083	0.0409	0.02
3.1	0.0426	0.02				3.1	0.0413	0.04
3.117	0.0429	0.04				3.117	0.0412	0.02
3.133	0.0433	0.04				3.133	0.0407	0.02
3.15	0.043	0.02				3.15	0.0414	0.02
3.167	0.0429	0.04				3.167	0.0415	0.04
3.183	0.0433	0.04				3.183	0.0416	0.02
3.2	0.0431	0.02				3.2	0.0419	0.02
3.217	0.0436	0.04				3.217	0.0411	0.02
3.233	0.0431	0.04				3.233	0.0417	0.02
3.25	0.0432	0.02				3.25	0.0416	0.02
3.267	0.0435	0.02				3.267	0.0412	0.02
3.283	0.0431	0.04				3.283	0.0414	0.04
3.3	0.0435	0.06				3.3	0.041	0.04
3.317	0.0429	0.04				3.317	0.0411	0.04
3.333	0.0428	0.04				3.333	0.0411	0.04
3.35	0.0429	0.02				3.35	0.0408	0.02
3.367	0.0423	0.02				3.367	0.0408	0.04
3.383	0.0424	0.02				3.383	0.0402	0.04
3.4	0.0418	0.02				3.4	0.0403	0.02
3.417	0.0413	0.04				3.417	0.0399	0.02
3.433	0.0415	0.02				3.433	0.0395	0.02
3.45	0.0407	0.04				3.45	0.0394	0.02
3.467	0.0406	0.02				3.467	0.0392	0.04
3.483	0.0402	0.02				3.483	0.0396	0.04
3.5	0.0403	0.02				3.5	0.0397	0.04
3.517	0.0405	0.04				3.517	0.0396	0.04
3.533	0.0399	0.06				3.533	0.0395	0.04
3.55	0.0405	0.06				3.55	0.039	0.02
3.567	0.0397	0.04				3.567	0.0393	0.02
3.583	0.0396	0.02				3.583	0.0388	0.02
3.6	0.042	0.02				3.6	0.0385	0.04
3.617	0.043	0.02				3.617	0.0386	0.02
3.633	0.0412	0.04				3.633	0.0383	0.04
3.65	0.038	0.02				3.65	0.0391	0.04
3.667	0.038	0.02				3.667	0.0386	0.02
3.683	0.0387	0.02				3.683	0.0388	0.04
3.7	0.0381	0.02				3.7	0.0386	0.02
3.717	0.0385	0.04				3.717	0.038	0.04
3.733	0.0388	0.02				3.733	0.0384	0.02
3.75	0.0386	0.04				3.75	0.0377	0.04
3.767	0.0384	0.04				3.767	0.0377	0.02
3.783	0.0381	0.04				3.783	0.0375	0.04
3.8	0.0386	0.04				3.8	0.0372	0.02
3.817	0.0384	0.04				3.817	0.0378	0.02
3.833	0.0381	0.04				3.833	0.0372	0.04
3.85	0.0383	0.02				3.85	0.0374	0.04
3.867	0.0378	0				3.867	0.0371	0.04
3.883	0.0379	0				3.883	0.0366	0.04
3.9	0.0379	0				3.9	0.0368	0.02
3.917	0.0376	0.02				3.917	0.0363	0.02
3.933	0.0379	0.04				3.933	0.0363	0.02
3.95	0.0373	0.02				3.95	0.0359	0.02
3.967	0.0376	0.02				3.967	0.0358	0.02
3.983	0.0377	0.02				3.983	0.0362	0.02
4	0.0371	0.02				4	0.0357	0.02
4.017	0.0379	0.02				4.017	0.0358	0.02
4.033	0.0377	0.02				4.033	0.0353	0.02
4.05	0.0376	0.02				4.05	0.035	0.04
4.067	0.0378	0.02				4.067	0.0351	0.04
4.083	0.0369	0.02				4.083	0.0349	0.04
4.1	0.0377	0.02				4.1	0.0348	0.04
4.117	0.0374	0.02				4.117	0.0346	0.02
4.133	0.0374	0.02				4.133	0.0345	0
4.15	0.0374	0.04				4.15	0.0348	0.04
4.167	0.0367	0.02				4.167	0.0346	0.04
4.183	0.0374	0.02				4.183	0.0345	0.04
4.2	0.0374	0.04				4.2	0.0342	0.02
4.217	0.0369	0.02				4.217	0.0338	0.02
4.233	0.037	0				4.233	0.034	0
4.25	0.0362	0.02				4.25	0.0338	0.02
4.267	0.0368	0.02				4.267	0.0339	0.04
4.283	0.0364	0.04				4.283	0.0339	0.02
4.3	0.036	0.02				4.3	0.0338	0.02
4.317	0.0359	0.02				4.317	0.0337	0.04
4.333	0.0353	0.04				4.333	0.0335	0.04
4.35	0.0359	0.04				4.35	0.0334	0.04
4.367	0.0357	0.04				4.367	0.0331	0.02
4.383	0.0352	0.02				4.383	0.033	0.04
4.4	0.0353	0				4.4	0.0333	0.04
4.417	0.0346	0.02				4.417	0.0331	0.02
4.433	0.0348	0.02				4.433	0.0329	0.02
4.45	0.0345	0.02				4.45	0.0327	0
4.467	0.0343	0.04				4.467	0.0327	0.02
4.483	0.0343	0.02				4.483	0.0327	0.02
4.5	0.0338	0.02				4.5	0.0324	0.02
4.517	0.034	0.02				4.517	0.0325	0.02
4.533	0.034	0.02				4.533	0.0323	0.04
4.55	0.0339	0.02				4.55	0.0323	0.02
4.567	0.0339	0.02				4.567	0.0324	0.02
4.583	0.0337	0.02				4.583	0.0322	0.04
4.6	0.0337	0.04				4.6	0.032	0.02
4.617	0.0337	0.04				4.617	0.0319	0.04
4.633	0.0335	0.02				4.633	0.0322	0.02
4.65	0.0333	0.02				4.65	0.0322	0.02
4.667	0.0334	0.02				4.667	0.032	0.02
4.683	0.0335	0.02				4.683	0.032	0.02
4.7	0.034	0.02				4.7	0.0317	0.02
4.717	0.0341	0.02				4.717	0.0318	0.04
4.733	0.0342	0.02				4.733	0.0317	0.02
4.75	0.0345	0.04				4.75	0.0316	0.02
4.767	0.0343	0.04				4.767	0.0315	0.04
4.783	0.0346	0.02				4.783	0.0316	0.02
4.8	0.0346	0.02				4.8	0.032	0.02
4.817	0.0345	0.02				4.817	0.0321	0.02
4.833	0.0348	0.02				4.833	0.0322	0.02
4.85	0.0346	0.02				4.85	0.0322	0
4.867	0.0347	0.02				4.867	0.0319	0.02
4.883	0.0346	0.02				4.883	0.032	0.04
4.9	0.0343	0.02				4.9	0.0319	0.02
4.917	0.0346	0.02				4.917	0.0324	0.02
4.933	0.0342	0				4.933	0.0322	0.04
4.95	0.0346	0.02				4.95	0.0322	0.02
4.967	0.0347	0.04				4.967	0.0325	0.02
4.983	0.0347	0.04				4.983	0.0325	0.04
5	0.0356	0.04				5	0.0331	0.02
5.017	0.0353	0.02				5.017	0.0334	0.02
5.033	0.0356	0.02				5.033	0.0332	0.02
5.05	0.0362	0.02				5.05	0.0334	0.02
5.067	0.0362	0.02				5.067	0.0332	0.02
5.083	0.0366	0.02				5.083	0.0342	0.02
5.1	0.0359	0.02				5.1	0.0339	0.02
5.117	0.0364	0.02				5.117	0.0339	0.02
5.133	0.0365	0.02				5.133	0.0343	0.04
5.15	0.0363	0.02				5.15	0.0344	0.02
5.167	0.0372	0.02				5.167	0.0356	0.02
5.183	0.0371	0.02				5.183	0.0356	0.02
5.2	0.0377	0.02				5.2	0.0358	0.02
5.217	0.0382	0.02				5.217	0.0365	0.02
5.233	0.0381	0.02				5.233	0.0364	0.02
5.25	0.0418	0.02				5.25	0.0379	0.02
5.267	0.0421	0.04				5.267	0.0375	0.02
5.283	0.042	0.02				5.283	0.0377	0.02
5.3	0.0422	0.02				5.3	0.039	0.02
5.317	0.0419	0.02				5.317	0.0389	0.02
5.333	0.0437	0.02				5.333	0.0409	0.02
5.35	0.0434	0.02				5.35	0.0409	0.02
5.367	0.045	0.02				5.367	0.0416	0
5.383	0.0459	0.02				5.383	0.0432	0.02
5.4	0.0453	0.04				5.4	0.0426	0
5.417	0.0477	0.04				5.417	0.0455	0.02
5.433	0.0471	0.02				5.433	0.0452	0
5.45	0.0492	0.02				5.45	0.0459	0
5.467	0.0503	0.02				5.467	0.0481	0.02
5.483	0.0498	0.02				5.483	0.0469	0.02
5.5	0.0523	0.02				5.5	0.05	0.02
5.517	0.0515	0.02				5.517	0.0492	0.02
5.533	0.0539	0.02				5.533	0.0503	0.02
5.55	0.0562	0.02				5.55	0.054	0.02
5.567	0.0571	0.02				5.567	0.0546	0
5.583	0.0624	0.02				5.583	0.0605	0
5.6	0.0617	0.02				5.6	0.0605	0.02
5.617	0.0648	0				5.617	0.0633	0.02
5.633	0.0664	0.02				5.633	0.0656	0.02
5.65	0.0664	0.02				5.65	0.065	0.02
5.667	0.072	0				5.667	0.0687	0
5.683	0.0713	0.02				5.683	0.0681	0.02
5.7	0.0756	0.02				5.7	0.071	0.02
5.717	0.0786	0.02				5.717	0.0741	0.02
5.733	0.078	0				5.733	0.0745	0
5.75	0.0866	0.04				5.75	0.0787	0.02
5.767	0.0851	0.04				5.767	0.0785	0.02
5.783	0.0902	0.02				5.783	0.0806	0
5.8	0.0944	0.02				5.8	0.0832	0.02
5.817	0.0929	0.02				5.817	0.083	0.02
5.833	0.1037	0.02				5.833	0.0874	0.02
5.85	0.1005	0.02				5.85	0.0883	0
5.867	0.1071	0.02				5.867	0.0916	0
5.883	0.1142	0.02				5.883	0.0948	0
5.9	0.1103	0.02				5.9	0.0947	0.02
5.917	0.1227	0.02				5.917	0.0996	0.02
5.933	0.1181	0				5.933	0.0999	0.04
5.95	0.1233	0.02				5.95	0.1022	0.02
5.967	0.1281	0				5.967	0.1049	0
5.983	0.1217	0.02				5.983	0.1046	0
6	0.133	0.02				6	0.1091	0.02
6.017	0.1295	0.02				6.017	0.1075	0
6.033	0.1316	0.04				6.033	0.1075	0
6.05	0.1377	0.02				6.05	0.1084	0.02
6.067	0.1306	0.02				6.067	0.1047	0.02
6.083	0.1367	0.02				6.083	0.1068	0.02
6.1	0.1313	0.02				6.1	0.105	0.02
6.117	0.1315	0.02				6.117	0.1054	0.02
6.133	0.1352	0.02				6.133	0.1062	0.02
6.15	0.1277	0.02				6.15	0.1042	0.02
6.167	0.1332	0.02				6.167	0.108	0
6.183	0.1305	0.02				6.183	0.1064	0.02
6.2	0.1281	0.02				6.2	0.1074	0.02
6.217	0.1337	0				6.217	0.1098	0.02
6.233	0.1262	0.02				6.233	0.1068	0.02
6.25	0.1341	0.02				6.25	0.1098	0.02
6.267	0.1313	0.02				6.267	0.1087	0
6.283	0.1309	0.04				6.283	0.1095	0.02
6.3	0.1367	0.02				6.3	0.1119	0.02
6.317	0.1308	0.02				6.317	0.1109	0.02
6.333	0.1397	0.02				6.333	0.1157	0.02
6.35	0.1395	0				6.35	0.1143	0.02
6.367	0.1394	0				6.367	0.1153	0.02
6.383	0.1438	0				6.383	0.116	0.02
6.4	0.1345	0.02				6.4	0.1112	0
6.417	0.1354	0.02				6.417	0.1109	0.02
6.433	0.1316	0.02				6.433	0.1056	0.02
6.45	0.1296	0				6.45	0.1049	0.02
6.467	0.1328	0				6.467	0.1044	0.02
6.483	0.1229	0.02				6.483	0.1021	0.02
6.5	0.1254	0.02				6.5	0.1046	0.02
6.517	0.1249	0.02				6.517	0.1026	0.02
6.533	0.1237	0.02				6.533	0.1032	0.02
6.55	0.1261	0.04				6.55	0.1032	0.04
6.567	0.1175	0.02				6.567	0.1018	0.02
6.583	0.1187	0.02				6.583	0.1019	0
6.6	0.1143	0.02				6.6	0.0985	0.02
6.617	0.1144	0.02				6.617	0.097	0.02
6.633	0.1158	0.02				6.633	0.0943	0.02
6.65	0.1089	0.02				6.65	0.092	0.02
6.667	0.1057	0.02				6.667	0.0947	0
6.683	0.1092	0.02				6.683	0.0977	0.02
6.7	0.1129	0.04				6.7	0.1	0.02
6.717	0.1431	0.02				6.717	0.1027	0.02
6.733	0.2648	0				6.733	0.1019	0.02
6.75	0.2926	0.02				6.75	0.1235	0.02
6.767	0.2489	0.02				6.767	0.1342	0.02
6.783	0.1326	0.04				6.783	0.1223	0.02
6.8	0.055	0.02				6.8	0.1016	0.02
6.817	0.0524	0.02				6.817	0.097	0.02
6.833	0.0631	0.04				6.833	0.152	0.02
6.85	0.0649	0.02				6.85	0.2126	0.02
6.867	0.0644	0.04				6.867	0.1265	0.04
6.883	0.0567	0.02				6.883	0.0906	0.02
6.9	0.0564	0.02				6.9	0.1025	0.02
6.917	0.0514	0.02				6.917	0.0638	0.02
6.933	0.0481	0.02				6.933	0.0542	0.02
6.95	0.0492	0.02				6.95	0.0361	0.04
6.967	0.0461	0.04				6.967	0.0316	0.04
6.983	0.0471	0.04				6.983	0.0506	0.02
7	0.0458	0.02				7	0.0512	0.02
7.017	0.0441	0.04				7.017	0.0344	0.02
7.033	0.0438	0.04				7.033	0.028	0.02
						7.05	0.0278	0

## Sheet: Fig6C_exp3
CTRL							dCNBP RNAi
Time [min,]:	UV [A,U,]:	Conductivity [mS/cm]:	Events:				Time [min,]:	UV [A,U,]:	Conductivity [mS/cm]:	Events:
0	0.0647	0.02	Fraction 0,92 min	0.078843			0	0.0706	0.04	Fraction 0,96 min
0.017	0.0649	0.02	Fraction 1,42 min	0.0790867			0.017	0.0694	0.04	Fraction 1,46 min
0.033	0.065	0.04	Fraction 1,92 min	0.0792085			0.033	0.0684	0.04	Fraction 1,96 min
0.05	0.0652	0.04	Fraction 2,42 min	0.0794523			0.05	0.0718	0.02	Fraction 2,46 min
0.067	0.0977	0.02	Fraction 2,92 min	0.119057			0.067	0.1334	0.02	Fraction 2,96 min
0.083	0.1474	0.04	Fraction 3,42 min	0.179621			0.083	0.1317	0.04	Fraction 3,46 min
0.1	0.1432	0.02	Fraction 3,92 min	0.174503			0.1	0.1366	0.02	Fraction 3,96 min
0.117	0.0711	0	Fraction 4,42 min	0.086642			0.117	0.1156	0.02	Fraction 4,46 min
0.133	0.0658	0.04	Fraction 4,92 min	0.0801834			0.133	0.1184	0.02	Fraction 4,96 min
0.15	0.0641	0.04	Fraction 5,42 min	0.0781118			0.15	0.076	0	Fraction 5,46 min
0.167	0.0633	0.04	Fraction 5,92 min	0.0771369			0.167	0.0758	0.02	Fraction 5,96 min
0.183	0.0631	0.02	Fraction 6,42 min	0.0768932			0.183	0.0762	0.04	Fraction 6,46 min
0.2	0.0627	0.02	Fraction 6,92 min	0.0764058			0.2	0.0763	0.02	Fraction 6,96 min
0.217	0.0624	0.04	Fraction 6,93 min	0.0760402			0.217	0.076	0.02	Fraction 6,97 min
0.233	0.0623	0.02		0.0759183			0.233	0.0757	0.02
0.25	0.0623	0.02		0.0759183			0.25	0.0752	0.02
0.267	0.0625	0.04		0.0761621			0.267	0.0749	0.02
0.283	0.0627	0.02		0.0764058			0.283	0.0747	0
0.3	0.0628	0		0.0765276			0.3	0.0744	0.02
0.317	0.0627	0.02		0.0764058			0.317	0.0743	0.02
0.333	0.0626	0.02		0.0762839			0.333	0.0742	0.02
0.35	0.0627	0.02		0.0764058			0.35	0.0742	0.02
0.367	0.0631	0.02		0.0768932			0.367	0.0742	0.02
0.383	0.0635	0.02		0.0773807			0.383	0.0742	0.02
0.4	0.0636	0.02		0.0775025			0.4	0.0744	0.02
0.417	0.0635	0.02		0.0773807			0.417	0.0746	0.04
0.433	0.0635	0.04		0.0773807			0.433	0.0748	0.04
0.45	0.0634	0.02		0.0772588			0.45	0.0751	0.02
0.467	0.0633	0.04		0.0771369			0.467	0.0754	0.02
0.483	0.0633	0.02		0.0771369			0.483	0.0757	0.02
0.5	0.0631	0.02		0.0768932			0.5	0.0759	0.04
0.517	0.0632	0.04		0.0770151			0.517	0.076	0.02
0.533	0.0631	0.02		0.0768932			0.533	0.076	0
0.55	0.0632	0.02		0.0770151			0.55	0.0758	0.02
0.567	0.0633	0.02		0.0771369			0.567	0.0758	0.02
0.583	0.0632	0		0.0770151			0.583	0.0756	0
0.6	0.0632	0.02		0.0770151			0.6	0.0754	0.02
0.617	0.0629	0.02		0.0766495			0.617	0.0751	0.04
0.633	0.0628	0.02		0.0765276			0.633	0.0749	0.02
0.65	0.0626	0.02		0.0762839			0.65	0.0747	0.02
0.667	0.0624	0.02		0.0760402			0.667	0.0744	0.02
0.683	0.0624	0		0.0760402			0.683	0.0742	0.02
0.7	0.0622	0.02		0.0757965			0.7	0.0739	0.02
0.717	0.0622	0.02		0.0757965			0.717	0.0736	0.02
0.733	0.0621	0.02		0.0756746			0.733	0.0734	0.02
0.75	0.0619	0.02		0.0754309			0.75	0.0732	0.02
0.767	0.062	0		0.0755528			0.767	0.0731	0.02
0.783	0.062	0		0.0755528			0.783	0.0731	0.02
0.8	0.0621	0		0.0756746			0.8	0.0731	0.02
0.817	0.0622	0.02		0.0757965			0.817	0.0732	0.02
0.833	0.0621	0.02		0.0756746			0.833	0.0731	0.02
0.85	0.0622	0.02		0.0757965			0.85	0.0732	0.02
0.867	0.0622	0		0.0757965			0.867	0.0732	0.02
0.883	0.0621	0.02		0.0756746			0.883	0.0732	0.02
0.9	0.0619	0.02		0.0754309			0.9	0.0732	0.02
0.917	0.0616	0.02		0.0750653			0.917	0.0731	0
0.933	0.0613	0		0.0746997			0.933	0.0729	0
0.95	0.0609	0		0.0742123			0.95	0.0727	0
0.967	0.0605	0.02		0.0737249			0.967	0.0723	0.02
0.983	0.06	0		0.0731156			0.983	0.072	0
1	0.0594	0		0.0723844			1	0.0714	0.02
1.017	0.0588	0.02		0.0716533			1.017	0.0709	0
1.033	0.058	0.02		0.0706784			1.033	0.0703	0.02
1.05	0.0574	0.02		0.0699472			1.05	0.0696	0.02
1.067	0.0568	0.04		0.0692161			1.067	0.069	0.02
1.083	0.0561	0.02		0.0683631			1.083	0.0682	0.02
1.1	0.0556	0.02		0.0677538			1.1	0.0677	0
1.117	0.055	0.02		0.0670226			1.117	0.0672	0
1.133	0.0548	0.02		0.0667789			1.133	0.0665	0.02
1.15	0.0545	0		0.0664133			1.15	0.0662	0.04
1.167	0.0541	0.02		0.0659259			1.167	0.0655	0.02
1.183	0.054	0.02		0.065804			1.183	0.0653	0.02
1.2	0.0539	0.02		0.0656822			1.2	0.0651	0.02
1.217	0.0539	0.02		0.0656822			1.217	0.0649	0
1.233	0.054	0.02		0.065804			1.233	0.0651	0.04
1.25	0.0539	0.02		0.0656822			1.25	0.0649	0.02
1.267	0.0541	0		0.0659259			1.267	0.0652	0.02
1.283	0.0541	0		0.0659259			1.283	0.0653	0.04
1.3	0.0543	0		0.0661696			1.3	0.0653	0.02
1.317	0.0544	0.02		0.0662915			1.317	0.0655	0.04
1.333	0.0543	0		0.0661696			1.333	0.0653	0.04
1.35	0.0545	0.02		0.0664133			1.35	0.0653	0.02
1.367	0.0545	0.02		0.0664133			1.367	0.0652	0.02
1.383	0.0545	0		0.0664133			1.383	0.0648	0.02
1.4	0.0544	0		0.0662915			1.4	0.0646	0.02
1.417	0.054	0		0.065804			1.417	0.064	0.04
1.433	0.0537	0.02		0.0654384			1.433	0.0635	0.02
1.45	0.053	0.02		0.0645854			1.45	0.063	0.04
1.467	0.0526	0.02		0.064098			1.467	0.0622	0.02
1.483	0.0519	0		0.063245			1.483	0.0617	0.02
1.5	0.0511	0		0.0622701			1.5	0.0607	0.04
1.517	0.0505	0.02		0.0615389			1.517	0.0601	0.02
1.533	0.0497	0		0.0605641			1.533	0.0594	0.02
1.55	0.0491	0		0.0598329			1.55	0.0587	0
1.567	0.0486	0		0.0592236			1.567	0.0584	0.02
1.583	0.0479	0.02		0.0583706			1.583	0.0577	0.02
1.6	0.0477	0.02		0.0581269			1.6	0.0575	0
1.617	0.0471	0		0.0573957			1.617	0.0572	0.02
1.633	0.0469	0		0.057152			1.633	0.0567	0.02
1.65	0.0466	0		0.0567864			1.65	0.0567	0.02
1.667	0.0461	0.02		0.0561771			1.667	0.0561	0.02
1.683	0.0461	0		0.0561771			1.683	0.056	0.02
1.7	0.0458	0		0.0558116			1.7	0.0558	0.02
1.717	0.0457	0		0.0556897			1.717	0.0555	0.02
1.733	0.0457	0.02		0.0556897			1.733	0.0556	0.02
1.75	0.0455	0		0.055446			1.75	0.0552	0
1.767	0.0457	0.02		0.0556897			1.767	0.0552	0
1.783	0.0455	0.02		0.055446			1.783	0.0553	0
1.8	0.0457	0.02		0.0556897			1.8	0.0551	0
1.817	0.0458	0.02		0.0558116			1.817	0.0555	0.02
1.833	0.0457	0.02		0.0556897			1.833	0.0552	0.04
1.85	0.046	0.02		0.0560553			1.85	0.0553	0.02
1.867	0.046	0.02		0.0560553			1.867	0.0554	0.02
1.883	0.0461	0.02		0.0561771			1.883	0.0552	0.02
1.9	0.0463	0.02		0.0564209			1.9	0.0556	0.02
1.917	0.046	0.02		0.0560553			1.917	0.0553	0.02
1.933	0.0462	0.02		0.056299			1.933	0.0553	0.02
1.95	0.0458	0		0.0558116			1.95	0.0553	0.04
1.967	0.0458	0.02		0.0558116			1.967	0.0549	0
1.983	0.0457	0.02		0.0556897			1.983	0.055	0
2	0.0452	0		0.0550804			2	0.0544	0.02
2.017	0.0452	0.02		0.0550804			2.017	0.0542	0.02
2.033	0.0448	0.02		0.054593			2.033	0.0539	0.02
2.05	0.0446	0		0.0543492			2.05	0.0534	0.02
2.067	0.0445	0.02		0.0542274			2.067	0.0535	0.02
2.083	0.0441	0.02		0.0537399			2.083	0.053	0.02
2.1	0.0441	0.02		0.0537399			2.1	0.0528	0.02
2.117	0.0437	0		0.0532525			2.117	0.0528	0.02
2.133	0.0437	0.02		0.0532525			2.133	0.0524	0
2.15	0.0436	0.02		0.0531307			2.15	0.0526	0
2.167	0.0433	0.02		0.0527651			2.167	0.0522	0
2.183	0.0434	0.02		0.0528869			2.183	0.0521	0.02
2.2	0.0431	0.02		0.0525214			2.2	0.0521	0.02
2.217	0.043	0.02		0.0523995			2.217	0.0516	0.02
2.233	0.043	0.02		0.0523995			2.233	0.0516	0.02
2.25	0.0425	0		0.0517902			2.25	0.0512	0
2.267	0.0425	0.02		0.0517902			2.267	0.0509	0
2.283	0.042	0.02		0.0511809			2.283	0.051	0.02
2.3	0.0419	0.02		0.051059			2.3	0.0504	0.02
2.317	0.0417	0.02		0.0508153			2.317	0.0505	0
2.333	0.0411	0.02		0.0500842			2.333	0.0499	0
2.35	0.0412	0		0.050206			2.35	0.0496	0
2.367	0.0408	0.02		0.0497186			2.367	0.0497	0.02
2.383	0.0407	0.02		0.0495967			2.383	0.0491	0.04
2.4	0.0407	0		0.0495967			2.4	0.0493	0.04
2.417	0.0402	0.02		0.0489874			2.417	0.0489	0.02
2.433	0.0404	0.02		0.0492312			2.433	0.0488	0.02
2.45	0.0401	0.02		0.0488656			2.45	0.0489	0.02
2.467	0.0401	0.02		0.0488656			2.467	0.0485	0.02
2.483	0.0401	0.02		0.0488656			2.483	0.0488	0.02
2.5	0.0398	0.02		0.0485			2.5	0.0485	0
2.517	0.0401	0.02		0.0488656			2.517	0.0484	0.02
2.533	0.0401	0.02		0.0488656			2.533	0.0487	0
2.55	0.0402	0		0.0489874			2.55	0.0485	0
2.567	0.0405	0		0.049353			2.567	0.0488	0.02
2.583	0.0405	0		0.049353			2.583	0.0488	0
2.6	0.0409	0		0.0498405			2.6	0.0489	0.02
2.617	0.0412	0.02		0.050206			2.617	0.0493	0.02
2.633	0.0416	0.02		0.0506935			2.633	0.0493	0.02
2.65	0.0421	0.02		0.0513028			2.65	0.0497	0
2.667	0.0426	0.02		0.0519121			2.667	0.05	0
2.683	0.0429	0.02		0.0522776			2.683	0.0502	0.02
2.7	0.0436	0.04		0.0531307			2.7	0.0508	0
2.717	0.0441	0.02		0.0537399			2.717	0.0512	0.02
2.733	0.0447	0		0.0544711			2.733	0.0515	0.02
2.75	0.0454	0.02		0.0553241			2.75	0.0521	0
2.767	0.0456	0.02		0.0555678			2.767	0.0525	0.02
2.783	0.0462	0.02		0.056299			2.783	0.0527	0.02
2.8	0.0464	0		0.0565427			2.8	0.0531	0.02
2.817	0.0464	0		0.0565427			2.817	0.0531	0.02
2.833	0.0463	0		0.0564209			2.833	0.0533	0.02
2.85	0.0459	0.02		0.0559334			2.85	0.053	0
2.867	0.0461	0		0.0561771			2.867	0.053	0
2.883	0.0459	0		0.0559334			2.883	0.0526	0.02
2.9	0.0456	0.02		0.0555678			2.9	0.0516	0.04
2.917	0.045	0		0.0548367			2.917	0.0507	0.02
2.933	0.0441	0		0.0537399			2.933	0.0503	0.02
2.95	0.0438	0.02		0.0533744			2.95	0.0501	0.02
2.967	0.0431	0.02		0.0525214			2.967	0.0495	0.02
2.983	0.0428	0.02		0.0521558			2.983	0.0489	0
3	0.0421	0		0.0513028			3	0.0486	0.02
3.017	0.0416	0.02		0.0506935			3.017	0.0479	0.02
3.033	0.0413	0		0.0503279			3.033	0.0475	0.04
3.05	0.0407	0.02		0.0495967			3.05	0.0471	0.02
3.067	0.0411	0.02		0.0500842			3.067	0.0464	0.02
3.083	0.0402	0		0.0489874			3.083	0.0463	0.02
3.1	0.0398	0		0.0485			3.1	0.0458	0
3.117	0.0398	0		0.0485			3.117	0.0458	0.02
3.133	0.0396	0		0.0482563			3.133	0.0455	0
3.15	0.0401	0		0.0488656			3.15	0.0454	0
3.167	0.0395	0		0.0481344			3.167	0.0453	0
3.183	0.0393	0		0.0478907			3.183	0.0446	0.02
3.2	0.0396	0		0.0482563			3.2	0.045	0
3.217	0.0392	0.02		0.0477688			3.217	0.0449	0.02
3.233	0.0397	0.02		0.0483781			3.233	0.0448	0.02
3.25	0.0396	0.02		0.0482563			3.25	0.0451	0.02
3.267	0.0392	0		0.0477688			3.267	0.0448	0.02
3.283	0.0397	0		0.0483781			3.283	0.045	0.02
3.3	0.0395	0.02		0.0481344			3.3	0.0452	0.02
3.317	0.0397	0.02		0.0483781			3.317	0.0449	0.04
3.333	0.0398	0.02		0.0485			3.333	0.045	0.02
3.35	0.0398	0.02		0.0485			3.35	0.0447	0.02
3.367	0.0405	0.02		0.049353			3.367	0.0448	0.02
3.383	0.0402	0.02		0.0489874			3.383	0.0451	0.02
3.4	0.0405	0.02		0.049353			3.4	0.0444	0.02
3.417	0.0402	0.02		0.0489874			3.417	0.0447	0
3.433	0.0399	0		0.0486219			3.433	0.0448	0
3.45	0.04	0.02		0.0487437			3.45	0.0447	0.02
3.467	0.0399	0.02		0.0486219			3.467	0.0448	0.02
3.483	0.0398	0		0.0485			3.483	0.0445	0
3.5	0.0395	0		0.0481344			3.5	0.0446	0.02
3.517	0.0394	0		0.0480126			3.517	0.0442	0.04
3.533	0.0395	0		0.0481344			3.533	0.044	0.02
3.55	0.0393	0.02		0.0478907			3.55	0.0441	0.02
3.567	0.0397	0.02		0.0483781			3.567	0.0438	0.02
3.583	0.0386	0.02		0.0470377			3.583	0.0439	0
3.6	0.0383	0.02		0.0466721			3.6	0.0436	0
3.617	0.0382	0		0.0465503			3.617	0.0441	0.02
3.633	0.0378	0.02		0.0460628			3.633	0.0442	0
3.65	0.038	0		0.0463065			3.65	0.0442	0
3.667	0.0372	0.02		0.0453317			3.667	0.044	0.02
3.683	0.0376	0.02		0.0458191			3.683	0.043	0.02
3.7	0.0377	0.02		0.045941			3.7	0.0432	0
3.717	0.0373	0.02		0.0454535			3.717	0.0428	0
3.733	0.038	0		0.0463065			3.733	0.0427	0.02
3.75	0.0367	0		0.0447224			3.75	0.0429	0.02
3.767	0.0368	0		0.0448442			3.767	0.0422	0.02
3.783	0.0364	0.02		0.0443568			3.783	0.0428	0.02
3.8	0.0361	0.02		0.0439912			3.8	0.0424	0.02
3.817	0.0363	0.02		0.0442349			3.817	0.0426	0
3.833	0.0355	0.02		0.0432601			3.833	0.0423	0.02
3.85	0.0359	0.02		0.0437475			3.85	0.0416	0.02
3.867	0.0356	0.02		0.0433819			3.867	0.0419	0.02
3.883	0.0352	0.02		0.0428945			3.883	0.0413	0.04
3.9	0.0356	0.02		0.0433819			3.9	0.0412	0.02
3.917	0.0347	0.04		0.0422852			3.917	0.0411	0.02
3.933	0.0349	0.02		0.0425289			3.933	0.0406	0
3.95	0.0344	0		0.0419196			3.95	0.0411	0.02
3.967	0.0343	0		0.0417977			3.967	0.0404	0.02
3.983	0.0345	0.02		0.0420415			3.983	0.0407	0.02
4	0.0337	0.02		0.0410666			4	0.0403	0.02
4.017	0.0339	0		0.0413103			4.017	0.0398	0.02
4.033	0.0336	0		0.0409447			4.033	0.0401	0.02
4.05	0.0333	0.02		0.0405791			4.05	0.0395	0.02
4.067	0.0336	0.02		0.0409447			4.067	0.0394	0.02
4.083	0.0328	0.02		0.0399698			4.083	0.0392	0.02
4.1	0.0328	0		0.0399698			4.1	0.0391	0.02
4.117	0.0326	0.02		0.0397261			4.117	0.0394	0.02
4.133	0.0325	0.02		0.0396043			4.133	0.039	0.02
4.15	0.0324	0.02		0.0394824			4.15	0.0389	0.02
4.167	0.0322	0.04		0.0392387			4.167	0.0384	0.02
4.183	0.0325	0.02		0.0396043			4.183	0.038	0.02
4.2	0.0325	0.02		0.0396043			4.2	0.0381	0
4.217	0.0325	0.02		0.0396043			4.217	0.0379	0.02
4.233	0.0326	0.02		0.0397261			4.233	0.0379	0.02
4.25	0.032	0.02		0.038995			4.25	0.0378	0.02
4.267	0.0319	0.02		0.0388731			4.267	0.0375	0.02
4.283	0.0317	0.02		0.0386294			4.283	0.0376	0.02
4.3	0.0315	0		0.0383857			4.3	0.0374	0.02
4.317	0.0314	0.02		0.0382638			4.317	0.0373	0.02
4.333	0.0312	0.02		0.0380201			4.333	0.0369	0
4.35	0.0316	0.02		0.0385075			4.35	0.0366	0
4.367	0.0314	0.02		0.0382638			4.367	0.0368	0
4.383	0.0312	0.02		0.0380201			4.383	0.0366	0
4.4	0.0312	0.02		0.0380201			4.4	0.0365	0
4.417	0.0307	0.02		0.0374108			4.417	0.0362	0.02
4.433	0.0306	0		0.0372889			4.433	0.0359	0
4.45	0.0305	0.02		0.0371671			4.45	0.0361	0
4.467	0.0303	0.02		0.0369234			4.467	0.0358	0
4.483	0.0304	0.02		0.0370452			4.483	0.0359	0
4.5	0.0301	0		0.0366796			4.5	0.0355	0
4.517	0.0304	0		0.0370452			4.517	0.0352	0.02
4.533	0.0303	0.02		0.0369234			4.533	0.0355	0.02
4.55	0.03	0.02		0.0365578			4.55	0.0353	0.02
4.567	0.0301	0.02		0.0366796			4.567	0.0351	0
4.583	0.0298	0.02		0.0363141			4.583	0.0348	0.02
4.6	0.0298	0.02		0.0363141			4.6	0.0346	0.02
4.617	0.0297	0		0.0361922			4.617	0.0348	0.02
4.633	0.0296	0.02		0.0360704			4.633	0.0345	0.02
4.65	0.0295	0		0.0359485			4.65	0.0346	0
4.667	0.0295	0.02		0.0359485			4.667	0.0343	0.02
4.683	0.0296	0		0.0360704			4.683	0.0342	0.04
4.7	0.0294	0.02		0.0358266			4.7	0.0345	0.02
4.717	0.0294	0		0.0358266			4.717	0.0344	0.02
4.733	0.0301	0.02		0.0366796			4.733	0.0344	0.02
4.75	0.0296	0.02		0.0360704			4.75	0.0342	0
4.767	0.0294	0.02		0.0358266			4.767	0.034	0
4.783	0.0289	0.02		0.0352173			4.783	0.0341	0.02
4.8	0.0288	0.02		0.0350955			4.8	0.0337	0
4.817	0.0288	0.02		0.0350955			4.817	0.0339	0
4.833	0.0287	0.02		0.0349736			4.833	0.0337	0
4.85	0.0289	0		0.0352173			4.85	0.0337	0
4.867	0.0288	0.02		0.0350955			4.867	0.0339	0.02
4.883	0.0287	0.02		0.0349736			4.883	0.0339	0.02
4.9	0.0291	0.02		0.0354611			4.9	0.0339	0.02
4.917	0.0289	0		0.0352173			4.917	0.0341	0
4.933	0.0287	0		0.0349736			4.933	0.034	0
4.95	0.0284	0		0.034608			4.95	0.0339	0.02
4.967	0.0285	0		0.0347299			4.967	0.034	0.02
4.983	0.0285	0		0.0347299			4.983	0.0342	0.02
5	0.0286	0		0.0348518			5	0.0342	0.02
5.017	0.029	0		0.0353392			5.017	0.0344	0.02
5.033	0.029	0		0.0353392			5.033	0.0343	0.02
5.05	0.0291	0		0.0354611			5.05	0.0346	0.02
5.067	0.0295	0.02		0.0359485			5.067	0.0347	0.02
5.083	0.0293	0		0.0357048			5.083	0.0349	0
5.1	0.0292	0		0.0355829			5.1	0.0352	0.02
5.117	0.0292	0.02		0.0355829			5.117	0.0352	0.02
5.133	0.0295	0		0.0359485			5.133	0.0356	0
5.15	0.0295	0		0.0359485			5.15	0.0359	0.02
5.167	0.0297	0		0.0361922			5.167	0.0357	0
5.183	0.03	0		0.0365578			5.183	0.0362	0
5.2	0.0303	0		0.0369234			5.2	0.0362	0.02
5.217	0.0307	0.02		0.0374108			5.217	0.0368	0.02
5.233	0.0308	0		0.0375327			5.233	0.037	0.02
5.25	0.0312	0.02		0.0380201			5.25	0.0372	0
5.267	0.0311	0		0.0378982			5.267	0.0381	0
5.283	0.0312	0.02		0.0380201			5.283	0.0381	0
5.3	0.0318	0.04		0.0387513			5.3	0.0388	0.02
5.317	0.0317	0.02		0.0386294			5.317	0.0394	0.02
5.333	0.0324	0.02		0.0394824			5.333	0.0392	0.04
5.35	0.0327	0.02		0.039848			5.35	0.0406	0.02
5.367	0.0331	0.02		0.0403354			5.367	0.0405	0.02
5.383	0.0339	0		0.0413103			5.383	0.0416	0
5.4	0.0341	0.02		0.041554			5.4	0.0424	0
5.417	0.0353	0.02		0.0430163			5.417	0.0425	0
5.433	0.0354	0.02		0.0431382			5.433	0.0444	0.02
5.45	0.0356	0.02		0.0433819			5.45	0.0442	0.02
5.467	0.037	0		0.0450879			5.467	0.0455	0.02
5.483	0.0365	0		0.0444786			5.483	0.0466	0.02
5.5	0.038	0		0.0463065			5.5	0.0465	0.02
5.517	0.0386	0		0.0470377			5.517	0.0491	0.02
5.533	0.0391	0		0.047647			5.533	0.0488	0
5.55	0.0411	0		0.0500842			5.55	0.0504	0.02
5.567	0.0405	0		0.049353			5.567	0.0527	0.02
5.583	0.0429	0		0.0522776			5.583	0.0527	0.02
5.6	0.0425	0.02		0.0517902			5.6	0.0568	0.02
5.617	0.0428	0.02		0.0521558			5.617	0.0568	0.02
5.633	0.0459	0.02		0.0559334			5.633	0.0582	0.02
5.65	0.0563	0.02		0.0686068			5.65	0.061	0.02
5.667	0.0932	0		0.113573			5.667	0.0601	0.02
5.683	0.1092	0		0.13307			5.683	0.0652	0
5.7	0.0887	0.02		0.108089			5.7	0.0651	0
5.717	0.0847	0.02		0.103215			5.717	0.0679	0.02
5.733	0.08	0.02		0.0974874			5.733	0.0719	0.02
5.75	0.0846	0.02		0.103093			5.75	0.0695	0.02
5.767	0.0851	0		0.103702			5.767	0.0755	0.02
5.783	0.0896	0		0.109186			5.783	0.0753	0.02
5.8	0.0946	0.02		0.115279			5.8	0.0778	0.02
5.817	0.0942	0.02		0.114791			5.817	0.0838	0.02
5.833	0.0976	0		0.118935			5.833	0.0813	0.02
5.85	0.0979	0		0.1193			5.85	0.0901	0.02
5.867	0.101	0.02		0.123078			5.867	0.0889	0.02
5.883	0.1068	0.02		0.130146			5.883	0.0928	0.02
5.9	0.1065	0.02		0.12978			5.9	0.0993	0.02
5.917	0.1128	0.02		0.137457			5.917	0.0935	0
5.933	0.115	0.02		0.140138			5.933	0.1034	0
5.95	0.1183	0.02		0.14416			5.95	0.1019	0.02
5.967	0.1238	0.04		0.150862			5.967	0.1045	0
5.983	0.1234	0.02		0.150374			5.983	0.1133	0.02
6	0.1283	0		0.156345			6	0.1077	0.02
6.017	0.1319	0		0.160732			6.017	0.1185	0
6.033	0.1365	0.02		0.166338			6.033	0.1173	0
6.05	0.1415	0.02		0.172431			6.05	0.1213	0
6.067	0.1396	0.02		0.170116			6.067	0.1284	0.02
6.083	0.1431	0.04		0.174381			6.083	0.1207	0.02
6.1	0.1432	0.02		0.174503			6.1	0.13	0.02
6.117	0.1427	0		0.173893			6.117	0.1264	0.02
6.133	0.1443	0		0.175843			6.133	0.1283	0.02
6.15	0.1425	0		0.173649			6.15	0.1355	0
6.167	0.1457	0		0.177549			6.167	0.1291	0
6.183	0.1455	0.02		0.177305			6.183	0.1362	0.02
6.2	0.1431	0.02		0.174381			6.2	0.1313	0.02
6.217	0.1458	0.02		0.177671			6.217	0.1337	0.02
6.233	0.1431	0.02		0.174381			6.233	0.1402	0.02
6.25	0.1458	0.02		0.177671			6.25	0.1319	0
6.267	0.1465	0		0.178524			6.267	0.1405	0
6.283	0.1458	0		0.177671			6.283	0.1386	0
6.3	0.1487	0.02		0.181205			6.3	0.1404	0
6.317	0.1461	0.02		0.178036			6.317	0.1487	0.02
6.333	0.1487	0.02		0.181205			6.333	0.1432	0.02
6.35	0.1486	0.02		0.181083			6.35	0.1496	0
6.367	0.1465	0.02		0.178524			6.367	0.1448	0
6.383	0.1507	0.02		0.183642			6.383	0.1463	0
6.4	0.1481	0.02		0.180474			6.4	0.1534	0
6.417	0.1514	0.02		0.184495			6.417	0.1463	0.02
6.433	0.1511	0.02		0.184129			6.433	0.1562	0.02
6.45	0.1502	0.02		0.183033			6.45	0.1551	0.02
6.467	0.1516	0.02		0.184739			6.467	0.1563	0.02
6.483	0.1473	0.02		0.179499			6.483	0.1638	0.02
6.5	0.1487	0		0.181205			6.5	0.1576	0.02
6.517	0.1459	0.02		0.177793			6.517	0.1653	0.02
6.533	0.1424	0.02		0.173528			6.533	0.1593	0
6.55	0.1421	0		0.173162			6.55	0.1602	0
6.567	0.1378	0.02		0.167922			6.567	0.1662	0
6.583	0.1379	0.02		0.168044			6.583	0.1601	0
6.6	0.1344	0.02		0.163779			6.6	0.1654	0
6.617	0.1316	0.02		0.160367			6.617	0.1607	0
6.633	0.1301	0.02		0.158539			6.633	0.1597	0
6.65	0.1268	0.02		0.154518			6.65	0.1609	0.02
6.667	0.1262	0		0.153786			6.667	0.1513	0
6.683	0.1231	0		0.150009			6.683	0.1483	0
6.7	0.119	0		0.145013			6.7	0.1361	0
6.717	0.114	0.02		0.13892			6.717	0.1282	0.02
6.733	0.1059	0.02		0.129049			6.733	0.1227	0.02
6.75	0.1008	0.02		0.122834			6.75	0.1132	0
6.767	0.1006	0		0.12259			6.767	0.114	0
6.783	0.1069	0		0.130268			6.783	0.1131	0.02
6.8	0.1117	0		0.136117			6.8	0.1244	0.02
6.817	0.1512	0		0.184251			6.817	0.1414	0.04
6.833	0.185	0.02		0.22544			6.833	0.2097	0
6.85	0.1866	0.02		0.227389			6.85	0.1526	0.02
6.867	0.2144	0.02		0.261266			6.867	0.0537	0.02
6.883	0.2403	0.02		0.292828			6.883	0.0455	0.02
6.9	0.2753	0.02		0.335479			6.9	0.0543	0
6.917	0.2084	0		0.253955			6.917	0.0571	0.02
6.933	0.1574	0		0.191807			6.933	0.0595	0.02
6.95	0.0748	0.02		0.0911508			6.95	0.0578	0.02
6.967	0.0335	0.02		0.0408229			6.967	0.0549	0.02
6.983	0.0294	0.02		0.0358266			6.983	0.0512	0.02

## Sheet: Fig6D
Experiment1
CTRL	ODC		GAPDH			ct free mRNA- ct x	2^-dctx	2^dctx *100/sum
											CTRL	CNBP RNAi
poly	31.738	31.741	24.454	24.189	7.55195	-2.39511	5.26018	36.1157		poly	36.1157	31.3171
	31.744		23.924							80S	50.7214	30.9492
80S	31.409	31.5514	23.542	23.5095	8.04192	-2.88508	7.38746	50.7214		60S-40S	6.29704	24.3971
	31.694		23.477							Free	6.86587	13.3367
60S-40S	31.833	31.7646	26.669	26.7325	5.03207	0.124769	0.917151	6.29704
	31.696		26.796								100	100
Free	31.336	31.1318	25.892	25.975	5.15684	0	1	6.86587
	30.928		26.058
							14.5648
CNBP RNAi	ODC		GAPDH
poly	31.167	31.382	25.755	25.5194	5.86261	-1.23155	2.34819	31.3171
	31.597		25.284
80S	31.384	31.7793	25.98	25.9338	5.84557	-1.2145	2.32061	30.9492
	32.174		25.887
60S-40S	31.542	31.8348	26.368	26.3324	5.50237	-0.87131	1.82932	24.3971
	32.128		26.297
Free	31.766	31.7341	26.993	27.103	4.63106	0	1	13.3367
	31.702		27.213
							7.49813
Experimen2
		ODC		GAPDH
							ct free mRNA- ct x	2^-dctx	2^-dctx *100/sum	SUM
CNBP RNAi	Polysomes	30.8258	31.3288	26.219	25.326	6.00281	-4.15032	17.7571	37.9205	46.8271
		31.0464		25.3285
		31.4937		24.993
		31.9494		24.7635									CTRL	CNBP RNAi
	80S	31.2354	31.3699	25.5716	25.6929	5.677	-3.82451	14.1675	30.2549			Polysomes	76.128	37.9205
		31.623		25.7396								80S	17.7457	30.2549
		30.8881		25.6852								60S-40S	4.52695	29.6891
		31.7332		25.7752								FreemRNA	1.59932	2.13551
	60S-40S	30.9145	30.7118	25.6474	25.062	5.64976	-3.79728	13.9026	29.6891
		30.4425		25.2045
		30.6114		24.978
		30.8787		24.4181
	FreemRNA	31.1372	31.1847	29.1562	29.3322	1.85248	0	1	2.13551
		31.0029		29.2574
		31.2814		29.3505
		31.3172		29.5647
CTRL	Polysomes	31.1003	31.3105	24.7252	24.2421	7.06844	-5.5729	47.6002	76.128	62.5265
		31.7185		24.1691
		31.6173		24.051
		30.8059		24.023
	80S	30.8057	31.2324	26.1162	26.2649	4.96749	-3.47194	11.0958	17.7457
		31.1584		26.2137
		31.5611		26.287
		31.4042		26.4426
	60S-40S	31.5721	31.5071	28.7704	28.5104	2.99663	-1.50108	2.83054	4.52695
		31.0915		28.4182
		32.3383		28.3929
		31.0263		28.4603
	FreemRNA	30.8073	30.802	29.5277	29.3065	1.49555	0	1	1.59932
		30.6166		29.018
		30.6045		29.2602
		31.1796		29.4199
Experiment3
	ODC		GAPDH		Dct	ct free mRNA- ct x	2^-dctx	2^-dctx *100/sum	SUM
CTRL
Polysomes	31.7797	31.6534	27.7737	27.3131	4.34034	-1.22008	2.3296	43.8592	5.31155
	31.6184		27.4345
	31.8734		27.0901
	31.3422		26.9542
80S	32.5386	32.0415	28.5556	28.5985	3.44304	-0.322785	1.25074	23.5476				CTRL	CNBP RNAi
	31.8654		28.3494								Polysomes	43.8592	39.4594
	32.1352		28.5724								80S	23.5476	11.064
	31.6269		28.9166								40S-60S	13.7663	10.3032
40S-60S	31.4342	31.9814	29.1213	29.3128	2.6686	0.451659	0.731202	13.7663			Free_mRNA	18.8269	39.1734
	32.7649		29.226
	31.5652		29.4283
	32.1612		29.4754
Free_mRNA	31.8513	31.663	28.9743	28.5427	3.12026	0	1	18.8269
	31.4129		28.7407
	31.6738		28.2856
	31.7139		28.1704
CNBP RNAi
Polysomes	32.3262	32.0572	26.8613	26.8812	5.17605	-0.0104923	1.0073	39.4594	2.55275
	32.2562		26.7589
	31.4667		26.9232
	32.1797		26.9813
80S	31.5677	31.729	28.1227	28.3875	3.34155	1.82401	0.282435	11.064
	Undetermined		28.3183
	31.9352		28.514
	31.6843		28.595
40S-60S	31.7353	31.5403	28.5566	28.3016	3.23877	1.92678	0.263015	10.3032
	31.2682		28.479
	31.7066		28.1439
	31.4513		28.0268
Free_mRNA	31.262	31.7369	26.3018	26.5714	5.16556	0	1	39.1734
	32.1205		26.4807
	32.1602		26.6276
	31.4051		26.8753

## Sheet: Fig6-S1A
Experiment1
			luc		ren	ratio	fold change
emptyLuc	empty	235.803	246.603	6696.89	7420.36	0.0332333	1
		247.403		7574.03
		256.603		7990.16
	cnbp	348.106	293.938	8849.79	9201.19	0.0319457	0.961255
		264.504		9148.97
		269.204		9604.8
dODC-Luc	empty	651.122	511.347	9098.92	8686.65	0.0588659	1
		431.31		8722.18
		451.61		8238.86
	cnbp	1153.37	1296.12	7775.78	8026.29	0.161485	2.74327
		1600.23		8086.24
		1134.77		8216.84
Experiment2
	LUC		Ren		Ratio
Empty Luc	2898.43	2434.14	8247.67	7273.9	0.334641	1	1
	2345.98		6247.09
	2058.02		7326.94
empty Luc CNBP	3802.64	3924.19	7839.33	7969.74	0.492386	1.47139	1.47139
	4079.75		8063.62
	3890.17		8006.27
dODC-Luc	461.911	355.375	6543.88	6938.56	0.0512174	0.153052	1
	127.601		7136.6
	476.612		7135.2
dODC-Luc CNBP	1615.53	2374.42	7462.14	6982.23	0.340066	1.01621	6.63966
Experiment3
	luc		ren		ratio	fold change
empty Luc	47.7	50.1333	855.83	876.3	0.0572102	1
	55.4		874.13
	47.3		898.94
empty Luc+dCNBP	50.5	172.833	858.538	867.905	0.199138	3.48082
	414		802.133
	54		943.045
dODC-Luc	1122.66	1586.97	4075.25	3492.76	0.454359	1
	1544.12		4089.75
	2094.12		2313.27
dODC-Luc +dCNBP	1811.67	1349.7	3209.42	3181.15	0.424281	0.933799
	1131.37		3360.18
	1106.06		2973.85

## Sheet: Fig6-S1B
Experiment1
		LUC	REN	LUC/REN	MEAN	FOLD CHANGE
empty luc	pcdna 3.1	352	22800	0.0154	0.0137	1
		172	13700	0.0125
		138	10600	0.013
	h-CNBP HA	984	13400	0.0732	0.0786	5.75				EMPTY LUC	ODC LUC
		1300	16400	0.0791					pcdna 3.1	1	1
		2300	27500	0.0836					h-CNBP HA	5.75	34.65
	d-CNBP HA	357	34900	0.0102	0.0106	0.78			d-CNBP HA	0.78	6.8
		285	26600	0.0107
		197	18100	0.0109
ODC LUC	pcdna 3.1	878	145000	0.00604	0.00605	1
		555	89800	0.00618
		241	40700	0.00592
	h-CNBP HA	29000	94500	0.307	0.21	34.65
		8360	60700	0.138
		20000	109000	0.184
	d-CNBP HA	23200	439000	0.0528	0.0411	6.8
		9630	276000	0.035
		4200	118000	0.0355
Experiment2
		LUC	REN	LUC/REN	MEAN	FOLD CHANGE
EMPTY LUC	PCDNA 3.1	124	5702	0.0217468	0.0228768	1
		164	7039	0.0232988							EMPTY LUC	ODC LUC
		145	6148	0.0235849						PCDNA 3.1	1	1
	HUMAN CNBP	249	7226	0.0344589	0.0322682	1.41052				HUMAN CNBP	1.41052	22.7945
		173	5109	0.0338618						DROSO CNBP	0.603316	11.1306
		270	9479	0.028484
	DROSO CNBP	325	16980	0.0191402	0.0138019	0.603316
		152	15550	0.00977492
		169	13530	0.0124908
ODC LUC	PCDNA 3.1	144	8894	0.0161907	0.0183184	1
		120	6590	0.0182094
		311	15130	0.0205552
	HUMAN CNBP	4106	11810	0.347671	0.41756	22.7945
		3923	9079	0.432096
		6058	12810	0.472912
	DROSO CNBP	1930	10280	0.187743	0.203896	11.1306
		2488	12390	0.200807
		5121	22950	0.223137

## Sheet: Fig6-S3
Experiment1
		ct	ct mean	dct	ddct	fold change
odc	CTRL	15.369	15.1791	15.347	-18.512	0	1
		15.325
odc	CNBP RNAi	16.127	16.2162	16.485	-18.2515	0.2605	0.834799
		16.843
gfp	CTRL	33.69	33.9549	33.859
		34.028
gfp	CNBP RNAi	34.673	34.4771	34.7365
		34.8
Experiment2
		ct	ct mean	dct	ddct	fold change
odc	CTRL	14.809	15.011	-19.04	0	1
		15.213
odc	CNBP RNAi	15.801	15.9475	-18.2705	0.7695	0.586621
		16.094
gfp	CTRL	33.804	34.051
		34.298
gfp	CNBP RNAi	34.437	34.218
		33.999
