# Supplementary material for: Translational control of polyamine metabolism by CNBP is required for Drosophila locomotor function
Source: eLife. 2021 Sep 14;10:e69269. doi: 10.7554/eLife.69269 (PMC8439652; doi:10.7554/eLife.69269)
Supplement: Figure 7—source data 1. [file elife-69269-fig7-data1.xlsx]

## Sheet: Fig7A
c179GAL4>
	Or-R	2xCNBP	Or-R + 1mM putr	CNBP2x+1mM putr
	63	37	52	46
	58	30	54	55
	57	29	60	51
	61	23	57	45
	55	34	55	43
	52	41	59	50
	45	37	47	52
	49	30	45	48
	46	38	57	52
	39	37	40	56
	48	46	47	48
	50	45	50	45
	53	46	46	55
	55	49	52	50
	55	49	52	47
	45	46	48	60
	49	38	47	54
	48	33	45	51
	51	35	40	59
	45	35	41	65
	44	34	49	44
	40	33	46	54
	45	39	50	48
	47	34	47	50
	44	30	45	61
	42	35	50	50
	44	24	57	51
	41	36	54	52
	39	30	59	46
	44	28	49	45
	63	37	52	46
	58	30	54	55
	57	29	60	51
	61	23	57	45
	55	34	55	43
	52	41	59	50
	45	37	47	52
	49	30	45	48
	46	38	57	52
	39	37	40	56
	48	46	47	48
	50	45	50	45
	53	46	46	55
	55	49	52	50
	55	49	52	47
	45	46	48	60
	49	38	47	54
	48	33	45	51
	51	35	40	59
	45	35	41	65
	44	34	49	44
	40	33	46	54
	45	39	50	48
	47	34	47	50
	44	30	45	61
	42	35	50	50
	44	24	57	51
	41	36	54	52
	39	30	59	46
	44	28	49	45
	60	29	55	40
	68	26	61	53
	70	35	56	60
	60	35	57	49
	57	37	55	50
	57	34	53	56
	52	44	58	56
	56	30	52	56
	57	32	53	49
	55	41	51	50
	55	19	52	58
	51	26	50	59
	60	29	50	52
	54	28	51	59
	50	33	50	60
	64	27	50	57
	62	32	60	48
	70	40	54	53
	67	32	61	59
	65	40	59	50
	50	30	57	50
	51	26	56	48
	50	30	60	47
	57	30	51	54
	57	33	53	50
	51	26	51	58
	52	27	54	50
	55	23	52	49
	55	21	52	53
	57	32	50	50
	60	31	60	64
	55	33	63	55
	57	36	59	53
	60	36	67	60
	56	36	69	57
	57	35	57	55
	53	36	59	60
	54	36	53	60
	56	38	53	57
	53	35	55	53
	57	38	52	52
	58	40	57	55
	61	42	54	51
	59	38	57	65
	55	43	58	51
	54	37	53	55
	53	39	55	55
	60	40	60	60
	54	39	58	52
	58	42	56	57
	57	39	55	50
	57	40	60	54
	55	36	55	51
	53	35	58	54
	58	37	55	53
	56	36	69	57
	57	35	57	55
	53	36	59	60
	54	36	53	60
	56	38	53	57
	53	35	55	53
	57	38	52	52
	58	40	57	55
	61	42	54	51
	59	38	57	65
	55	43	58	51
	54	37	53	55
	53	39	55	55
	60	40	60	60
	54	39	58	52
	58	42	56	57
	57	39	55	50
	57	40	60	54
	55	36	55	51
	53	35	58	54
	58	37	55	53

## Sheet: Fig7B
Or-R( II instar)	CNBPk-mut (II instar)	Or-R + putr 1 mM (II instar)	CNBPk-mut + putr (II instar)
67	40	66	54
61	33	63	55
60	44	68	54
66	33	60	52
70	40	60	55
68	33	60	51
65	35	61	50
60	39	60	50
62	35	64	53
63	36	60	50
59	42	61	50
57	43	62	51
61	37	59	62
57	36	60	55
59	34	68	57
57	39	67	61
58	38	59	53
56	38	61	54
58	36	61	52
59	38	63	53
61	40	61	50
57	39	61	51
59	37	62	50
56	40	62	51
56	39	60	50
63	39	64	50
61	36	59	50
56	35	59	49
58	39	60	56
59	33	61	64
60	40	62	69
67	42	58	52
55	34	61	52
57	43	57	60
60	37	63	52
56	37	68	50
55	40	61	49
53	34	66	54
61	36	58	50
60	37	62	53
65	30	63	49
60	31	61	50
64	39	58	52
67	31	69	49
59	32	56	50

## Sheet: Fig7C
MefGAL4>	Or-R	2xCNBP	2xCNBP;UAS ODC	C179GAL4>	Or-R	2xCNBP	2xCNBP;UAS ODC
	63	25	53		60	25	48
	61	30	50		60	28	46
	58	31	43		63	27	47
	59	40	44		65	34	48
	58	28	40		59	37	50
	72	33	52		57	36	47
	60	35	44		65	38	43
	74	32	47		62	37	45
	61	37	50		60	31	52
	67	35	43		61	29	55
	68	30	55		55	30	50
	60	33	45		54	34	46
	62	41	43		55	38	40
	63	50	60		53	36	38
	67	41	55		56	37	50
	65	31	50		56	29	50
	61	32	52		53	28	49
	70	29	56		54	30	53
	62	38	57		55	30	53
	62	28	43		55	31	55
	63	39	45		54	34	42
	65	37	45		62	40	38
	61	35	41		65	37	41
	62	34	42		59	36	41
	60	39	43		60	38	45
	61	38	49		60	35	47
	59	41	46		61	34	48
	58	39	44		59	34	49
	60	40	43		58	33	47
	62	39	48		61	36	48
	62	37	53
	60	35	52
	59	32	51
	61	34	50
	63	26	48
	60	36	50
	61	35	50
	58	31	53
	58	39	51
	60	43	46
	59	40	44
	58	43	40
	60	40	39
	58	39	39
	57	25	40
	57	30
	56	27
	57	25
	56	30
	57	30

## Sheet: Fig7D
Or-R	dys det-1	dys det-1 + putresc
67	46	34
64	46	40
65	48	40
63	45	47
64	42	35
61	39	41
64	38	40
64	42	48
62	48	35
61	45	48
60	44	38
61	48	41
60	45	35
62	49	34
67	45	40
63	41	32
60	37	36
62	43	35
59	45	41
60	35	43
70	48	38
60	49	40
60	43	37
60	37	50
61	41
59	27
60	27
58	33
72	33
74	35
71	31
77	36
69	32
76	28
75	36
71	32
70	40
65	30
61	38
63	37
77	35
76	37
77	34
73	40
80	38
69	42
76	34
73	30
68	45
61	32
70	42
75	37
71	45

## Sheet: Fig7-S1A
	EXP I
		ng polyamine/mg larvae
C179GAL4>		PUT		average	%
	Or-R	8.46		8.89	100
	2xCNBPrnai	4.56		5.35	60.18
	2xCNBP rnai + putr 1 mM	17.73		13.81	155.343
	EXP II
		ng polyamine/mg larvae
		PUT
C179GAL4>	Or-R	9.32
	2xCNBP RNAi	6.14
	2xCNBP rnai + putr 1 mM	9.89

## Sheet: Fig7-S1B
C179GAL4>	Or-R	2xCNBP	Or-R (Sperm. 1mM)	2xCNBP (Sperm. 1mM)
	51	24	62	60
	52	23	61	59
	54	26	65	60
	52	28	70	61
	50	32	60	55
	52	25	59	52
	55	30	57	57
	50	24	63	54
	55	26	69	57
	52	29	57	54
	52	26	62	50
	56	32	60	50
	57	22	59	49
	50	27	60	53
	50	35	65	50
	50	34	67	52
	51	37	62	57
	53	35	59	51
	50	32	58	55
	59	30	60	58
	53	38	61	55
	54	36	57	51
	53	32	63	51
	47	21	70	52
	60	39	55	48
	52.72	29.72	61.64	54.04
	0.60696	1.05122	0.820325	0.753835

## Sheet: Fig7-S2
TEST 13/6				TEST 25/6
Mhc GAL4 29°C 3days				Mhc GAL4 29°C 15days
MhcGAL4>	2xCNBP	Or-R			2xCNBP	Or-R
	1	1			0	0
	4	2			0	0
	5	2			0	0
	6	3			0	0
	7	4			0	0
	8	9			0	0
	8	10			1	0
	8	11			1	1
	8	12			1	1
	9	14			1	1
	10	16			2	4
	10	22			2	6
	12	24			2	7
	13	26			3	10
	14	26			3	23
	16	27			3	31
	17	28			5	37
	21	32			6	40
	22	33			6	55
	22	34			7	56
	24	35			7	56
	24	38			9	58
	26	41			13	62
	27	43			18	66
	31	43			20	66
	36	46			21	66
	36	47			26	67
	37	47			27	68
	40	48			31	69
	40	49			32	69
	43	49			35	72
	45	51			44	73
	46	52			45	75
	48	52			48	76
	48	54			53	82
	49	54			61	87
	50	58			63	93
	50	58		average	16.1081	39.9189
	51	60
	52	61		SEM	3.175	5.395
	52	62
	56	63
	56	66
	59	66
	61	66
	61	68
	64	79
	65	81						3days				15 days
	68	81							WT	2xdCNBP-RNAi		WT	2xdCNBP-RNAi
	74	90						Average	46.074	35.509		39.919	16.108
	77	92						SEM	4.045	3.198		5.395	3.175
	78	94
	87	119
		139
average	35.5094	46.0741
SEM	3.198	4.045
