# Supplementary material for: Translational control of polyamine metabolism by CNBP is required for Drosophila locomotor function
Source: eLife. 2021 Sep 14;10:e69269. doi: 10.7554/eLife.69269 (PMC8439652; doi:10.7554/eLife.69269)
Supplement: Source data 3. [file elife-69269-data3.xlsx]

## Sheet: Fig.1E
			mean grey value	255-mean grey value	Background subtraction	Normalization on LC	fold change			fold change
	CNBP	OR	93013	-92758	30788	0.794386	1		OR	1
	CNBP	MUT	123700	-123445	101	0.00449808	0.00566235		MUT	0.00566235
	background		123801	-123546
	ACTIN	OR	69483	-69228	38757
	ACTIN	MUT	85786	-85531	22454
	background		108240	-107985

## Sheet: Fig.1S1
CNBP		Pixel density (P.D.)	Inverted P.D.	Inverted P.D. - backgroud	CNBP/TUBULIN	fold change					CNBP/Tubulin
LARVAL BRAIN	NO UAS	172706	-172451	81456	0.801701	1			LARVAL BRAIN	NO UAS	1
	nsybG4>CNBP_RNAi	243476	-243221	10686	0.186606	0.232763				nsybG4>CNBP_RNAi	0.232763
	elavG4>CNBP_RNAi	252190	-251935	1972	0.080876	0.100881				elavG4>CNBP_RNAi	0.100881
ADULT BRAIN	nsybG4>CNBP_RNAi	253998	-253743	164	0.00285729	0.00356404			ADULT BRAIN	nsybG4>CNBP_RNAi	0.00356404
	elavG4>CNBP_RNAi	253000	-252745	1162	0.0235432	0.0293666				elavG4>CNBP_RNAi	0.0293666
	background	254162	-253907
TUBULIN		Pixel density (P.D.)	Inverted P.D.	Inverted P.D. - backgroud
LARVAL BRAIN	NO UAS	152558	-152303	101604
	nsybG4>CNBP_RNAi	196897	-196642	57265
	elavG4>CNBP_RNAi	229779	-229524	24383
ADULT BRAIN	nsybG4>CNBP_RNAi	196765	-196510	57397
	elavG4>CNBP_RNAi	204806	-204551	49356
	background	254162	-253907

## Sheet: Fig. 2B
HA	Pixel density (P.D.)	Inverted P.D.	Inverted P.D. - backgroud	HA-CNBP/TUBULIN	fold change
No UAS	246519	-246264	3216	0.0803357	1
dCNBP-3xHA	78648	-78393	171087	13.2328	164.719
background	249735	-249480
									HA-CNBP/TUBULIN
								No UAS	1
FLAG	Pixel density (P.D.)	Inverted P.D.	Inverted P.D. - backgroud	FLAG-CNBP/TUBULIN	fold change			dCNBP-3xHA	164.719
No UAS	248073	-247818	1662	0.0415168	1
hCNBP-FLAG	210982	-210727	38753	1.51515	36.4949
background	249735	-249480
TUBULIN
No UAS	209703	-209448	40032
dCNBP-3xHA	236806	-236551	12929
hCNBP-FLAG	224158	-223903	25577						FLAG-CNBP/TUBULIN
background	249735	-249480						No UAS	1
								hCNBP-FLAG	36.4949
									HA-CNBP/TUBULIN
							No UAS	1
							dCNBP-3xHA	164.719
							No UAS	1	FLAG-CNBP/TUBULIN
							hCNBP-FLAG	36.4949

## Sheet: Fig. 3A
										fold change
		mean grey value	255-mean grey value	Background subtraction	Norm on LC	fold change				ODC
ODC	No UAS	132399	-132144	115683	1.34866	1			No UAS	1
	2X CNBPi	216973	-216718	31109	0.315309	0.233793			2X CNBPi	0.233793
	background	248082	-247827
CNBP	No UAS	147841	-147586	103131	1.20233	1										ODC	CNBP
	2X CNBPi	220733	-220478	30239	0.306491	0.254914				CNBP					No UAS	1	1
	background	250972	-250717						No UAS	1					2X CNBPi	0.233793	0.254914
TUBULIN	No UAS	165177	-164922	85776					2X CNBPi	0.254914
	2X CNBPi	152291	-152036	98662
	background	250953	-250698

## Sheet: Fig. 3S1A
ACTIN
	mean grey value	255-mean grey value	Background subtraction
WT	218724	-218469	30346
MUT	227642	-227387	21428
background	249070	-248815							ODC
								WT	1
ODC								MUT	0.50731
	mean grey value	255-mean grey value	Background subtraction	Norm on LC	fold change
WT	72229	-71974	76550	2.52257	1
MUT	121357	-121102	27422	1.27973	0.50731				CNBP
background	148779	-148524						WT	1
								MUT	0.0159417									ODC	CNBP
CNBP																	WT	1	1
	mean grey value	255-mean grey value	Background subtraction	Norm on LC	fold change												MUT	0.50731	0.0159417
WT	164137	-163882	69647	2.2951	1
MUT	233000	-232745	784	0.0365876	0.0159417
background	233784	-233529

## Sheet: Fig. 5A
ODC
	mean grey value	255-mean grey value	Background subtraction	Norm on LC	fold change
CTRL1	61247	-60992	26356	0.220097	1				CTRL1	1								ODC/VIN	CNBP/VIN
CTRL2	47585	-47330	40018	0.360727	1.63894				CTRL2	1.63894							CTRL1	1	1
CTRL3	58499	-58244	29104	0.191025	0.867911				CTRL3	0.867911							CTRL2	1.63894	0.597302
DM2 1	80997	-80742	6606	0.0703073	0.319437				DM2 1	0.319437							CTRL3	0.867911	0.85381
DM2 2	85916	-85661	1687	0.0147958	0.0672238				DM2 2	0.0672238							DM2 1	0.319437	0.370666
DM2 3	85736	-85481	1867	0.0137271	0.0623685				DM2 3	0.0623685							DM2 2	0.0672238	0.12454
background	87603	-87348															DM2 3	0.0623685	0.00453166
VINCULIN
	mean grey value	255-mean grey value	Background subtraction
CTRL1	114916	-114661	119747
CTRL2	123726	-123471	110937
CTRL3	82306	-82051	152357
DM2 1	140704	-140449	93959
DM2 2	120644	-120389	114019
DM2 3	98655	-98400	136008
background	234663	-234408
CNBP
	mean grey value	255-mean grey value	Background subtraction	Norm on LC	fold change
CTRL1	37174969	-37174714	12927668	973.103	1				CTRL1	1
CTRL2	36534844	-36534589	13567793	581.236	0.597302				CTRL2	0.597302
CTRL3	36975293	-36975038	13127344	830.845	0.85381				CTRL3	0.85381
DM2 1	46156619	-46156364	3946018	360.696	0.370666				DM2 1	0.370666
DM2 2	43717351	-43717096	6385286	121.191	0.12454				DM2 2	0.12454
DM2 3	49788000	-49787745	314637	4.40977	0.00453166				DM2 3	0.00453166
background	50102637	-50102382
VINCULIN
	mean grey value	255-mean grey value	Background subtraction
CTRL1	238759	-238504	13285
CTRL2	228701	-228446	23343
CTRL3	236244	-235989	15800
DM2 1	241104	-240849	10940
DM2 2	199356	-199101	52688
DM2 3	180694	-180439	71350
background	252044	-251789

## Sheet: Fig. 5S1
CNBP
	mean grey value	255-mean grey value	Background subtraction	Norm on LC	fold change				CNBP/tubulin
No UAS	58863898	-58863643	5594514	222.853	1			No UAS	1
200	55306278	-55306023	9152134	221.21	0.992627			200	0.992627
475	52622664	-52622409	11835748	364.828	1.63708			475	1.63708
525	57430236	-57429981	7028176	222.904	1.00023			525	1.00023
background	64458412	-64458157
TUBULIN
	mean grey value	255-mean grey value	Background subtraction
No UAS	174207	-173952	25104
200	157938	-157683	41373
475	166869	-166614	32442
525	167781	-167526	31530
background	199311	-199056

## Sheet: Fig. 6S3
A
CNBP	Pixel density (P.D.)	Inverted P.D.	Inverted P.D. - backgroud	CNBP/TUBULIN	fold change				CNBP/Tubulin
NO UAS	206081	-205826	20138	0.171488	1			NO UAS	1
2xCNBPRNAi	222914	-222659	3305	0.0367043	0.214034			2xCNBPRNAi	0.214034
background	226219	-225964
TUBULIN	Pixel density (P.D.)	Inverted P.D.	Inverted P.D. - backgroud
NO UAS	108788	-108533	117431
2xCNBPRNAi	136175	-135920	90044
background	226219	-225964
B
									CNBP/tubulin
CNBP	Pixel density (P.D.)	Inverted P.D.	Inverted P.D. - backgroud	CNBP/TUBULIN	fold change			NO UAS	1
NO UAS	198579	-198324	45282	0.515582	1			2xCNBPRNAi	0.10346
2xCNBPRNAi	240649	-240394	3212	0.0533422	0.10346
background	243861	-243606
TUBULIN	Pixel density (P.D.)	Inverted P.D.	Inverted P.D. - backgroud
NO UAS	156034	-155779	87827
2xCNBPRNAi	183646	-183391	60215
background	243861	-243606

## Sheet: Fig. 6S4A
CNBP	mean grey value	255-mean grey value	Background subtraction	Norm on LC	fold change			CNBP
Scr	26425518	-26425263	9851120	2.01491	1		shScr	1
Sh	36176638	-36176383	100000	0.0130501	0.00647677		shCNBP	0.00647677
Background	36276638	-36276383
VINCULIN	mean grey value	255-mean grey value	Background subtraction
Scr	56059613	-56059358	4889115
Sh	53285954	-53285699	7662774
Background	60948728	-60948473
ODC	mean grey value	255-mean grey value	Background subtraction	Norm on LC	fold change			ODC										ODC	CNBP
Scr	223841	-223586	27764	0.18902	1		shScr	1									shScr	1	1
Sh	244374	-244119	7231	0.0462225	0.244538		shCNBP	0.244538									shCNBP	0.244538	0.00647677
Background	251605	-251350
GFP	mean grey value	255-mean grey value	Background subtraction
Scr	53554	-53299	146884
Sh	43999	-43744	156439
Background	200438	-200183

## Sheet: Fig. 7S2
MefGAL4
CNBP	Pixel density (P.D.)	Inverted P.D.	Inverted P.D. - backgroud	CNBP/TUBULIN	fold change				CNBP/TUBULIN
No UAS	206981	-206726	40757	0.297032	1			no UAS	1
2XCNBP RNAi	246783	-246528	955	0.00728235	0.024517			2XCNBP RNAi	0.024517
dOdc1	201938	-201683	45800	0.295646	0.995333				0.99
dOdc1 +2XCNBPRNAi	245265	-245010	2473	0.0259328	0.0873062			dOdc1	0.0873
background	247738	-247483						dOdc1 +2XCNBPRNAi	0.0873062
TUBULIN	Pixel density (P.D.)	Inverted P.D.	Inverted P.D. - backgroud
No UAS	110524	-110269	137214
2XCNBP RNAi	116599	-116344	131139
dOdc1	92823	-92568	154915
dOdc1 +2XCNBPRNAi	152376	-152121	95362
background	247738	-247483
